# Supplementary material for: Anti-invasive and cytotoxic evaluation of a (+)-pinoresinol-based semisynthetic library against glioblastoma
Source: publisher site journal article supplement (doi:10.3762/bjoc.22.54), 2026-05-11

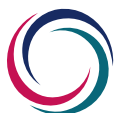

## Supporting Information

for

### **Anti-invasive and cytotoxic evaluation of a (+)-pinoresinol-based semisynthetic library against glioblastoma**

Chen Zhang, Kah Yean Lum, Jonathan M. White, Paul I. Forster, Nicholas Booth, Sunita A. Ramesh and Rohan A. Davis

*Beilstein J. Org. Chem.* **2026**, 22, 691–704. [doi:10.3762/bjoc.22.54](https://doi.org/10.3762/bjoc.22.54)

## Compound characterization data

## Table of contents

|                                                                                         |     |
|-----------------------------------------------------------------------------------------|-----|
| NMR data for salicifoliol ( <b>1</b> ) in CDCl <sub>3</sub> .....                       | S4  |
| <sup>1</sup> H NMR spectrum of salicifoliol ( <b>1</b> ) in CDCl <sub>3</sub> .....     | S5  |
| <sup>13</sup> C NMR spectrum of salicifoliol ( <b>1</b> ) in CDCl <sub>3</sub> .....    | S5  |
| COSY spectrum of salicifoliol ( <b>1</b> ) in CDCl <sub>3</sub> .....                   | S6  |
| HSQC spectrum of salicifoliol ( <b>1</b> ) in CDCl <sub>3</sub> .....                   | S6  |
| HMBC spectrum of salicifoliol ( <b>1</b> ) in CDCl <sub>3</sub> .....                   | S7  |
| ROESY spectrum of salicifoliol ( <b>1</b> ) in CDCl <sub>3</sub> .....                  | S7  |
| NMR data for (+)-pinoresinol ( <b>2</b> ) in CDCl <sub>3</sub> .....                    | S8  |
| <sup>1</sup> H NMR spectrum of (+)-pinoresinol ( <b>2</b> ) in CDCl <sub>3</sub> .....  | S9  |
| <sup>13</sup> C NMR spectrum of (+)-pinoresinol ( <b>2</b> ) in CDCl <sub>3</sub> ..... | S9  |
| COSY spectrum of (+)-pinoresinol ( <b>2</b> ) in CDCl <sub>3</sub> .....                | S10 |
| HSQC spectrum of (+)-pinoresinol ( <b>2</b> ) in CDCl <sub>3</sub> .....                | S10 |
| HMBC spectrum of (+)-pinoresinol ( <b>2</b> ) in CDCl <sub>3</sub> .....                | S11 |
| ROESY spectrum of (+)-pinoresinol ( <b>2</b> ) in CDCl <sub>3</sub> .....               | S11 |
| NMR data for (+)-eudesmin ( <b>3</b> ) in CDCl <sub>3</sub> .....                       | S12 |
| <sup>1</sup> H NMR spectrum of (+)-eudesmin ( <b>3</b> ) in CDCl <sub>3</sub> .....     | S13 |
| <sup>13</sup> C NMR spectrum of (+)-eudesmin ( <b>3</b> ) in CDCl <sub>3</sub> .....    | S13 |
| COSY spectrum of (+)-eudesmin ( <b>3</b> ) in CDCl <sub>3</sub> .....                   | S14 |
| HSQC spectrum of (+)-eudesmin ( <b>3</b> ) in CDCl <sub>3</sub> .....                   | S14 |
| HMBC spectrum of (+)-eudesmin ( <b>3</b> ) in CDCl <sub>3</sub> .....                   | S15 |
| ROESY spectrum of (+)-eudesmin ( <b>3</b> ) in CDCl <sub>3</sub> .....                  | S15 |
| NMR data for (+)-phillygenin ( <b>4</b> ) in CDCl <sub>3</sub> .....                    | S16 |
| <sup>1</sup> H NMR spectrum of (+)-phillygenin ( <b>4</b> ) in CDCl <sub>3</sub> .....  | S17 |

|                                                                                                                      |     |
|----------------------------------------------------------------------------------------------------------------------|-----|
| <sup>13</sup> C NMR spectrum of (+)-phillygenin ( <b>4</b> ) in CDCl <sub>3</sub> .....                              | S17 |
| COSY spectrum of (+)-phillygenin ( <b>4</b> ) in CDCl <sub>3</sub> .....                                             | S18 |
| HSQC spectrum of (+)-phillygenin ( <b>4</b> ) in CDCl <sub>3</sub> .....                                             | S18 |
| HMBC spectrum of (+)-phillygenin ( <b>4</b> ) in CDCl <sub>3</sub> .....                                             | S19 |
| ROESY spectrum of (+)-phillygenin ( <b>4</b> ) in CDCl <sub>3</sub> .....                                            | S19 |
| NMR data for (+)-5,5'-dibromopinoresinol ( <b>5</b> ) in CDCl <sub>3</sub> .....                                     | S20 |
| <sup>1</sup> H NMR spectrum of (+)-5,5'-dibromopinoresinol ( <b>5</b> ) in CDCl <sub>3</sub> .....                   | S21 |
| <sup>13</sup> C NMR spectrum of (+)-5,5'-dibromopinoresinol ( <b>5</b> ) in CDCl <sub>3</sub> .....                  | S21 |
| COSY spectrum of (+)-5,5'-dibromopinoresinol ( <b>5</b> ) in CDCl <sub>3</sub> .....                                 | S22 |
| HSQC spectrum of (+)-5,5'-dibromopinoresinol ( <b>5</b> ) in CDCl <sub>3</sub> .....                                 | S22 |
| HMBC spectrum of (+)-5,5'-dibromopinoresinol ( <b>5</b> ) in CDCl <sub>3</sub> .....                                 | S23 |
| ROESY spectrum of (+)-5,5'-dibromopinoresinol ( <b>5</b> ) in CDCl <sub>3</sub> .....                                | S23 |
| NMR data for (+)-4,4'-di(3,3-dimethylbutanoyl)pinoresinol ( <b>6</b> ) in CDCl <sub>3</sub> .....                    | S24 |
| <sup>1</sup> H NMR spectrum of (+)-4,4'-di(3,3-dimethylbutanoyl)pinoresinol ( <b>6</b> ) in CDCl <sub>3</sub> .....  | S25 |
| <sup>13</sup> C NMR spectrum of (+)-4,4'-di(3,3-dimethylbutanoyl)pinoresinol ( <b>6</b> ) in CDCl <sub>3</sub> ..... | S25 |
| COSY spectrum of (+)-4,4'-di(3,3-dimethylbutanoyl)pinoresinol ( <b>6</b> ) in CDCl <sub>3</sub> .....                | S26 |
| HSQC spectrum of (+)-4,4'-di(3,3-dimethylbutanoyl)pinoresinol ( <b>6</b> ) in CDCl <sub>3</sub> .....                | S26 |
| HMBC spectrum of (+)-4,4'-di(3,3-dimethylbutanoyl)pinoresinol ( <b>6</b> ) in CDCl <sub>3</sub> .....                | S27 |
| ROESY spectrum of (+)-4,4'-di(3,3-dimethylbutanoyl)pinoresinol ( <b>6</b> ) in CDCl <sub>3</sub> .....               | S27 |
| NMR data for (+)-4,4'-dipivaloylpinoresinol ( <b>7</b> ) in CDCl <sub>3</sub> .....                                  | S28 |
| <sup>1</sup> H NMR spectrum of (+)-4,4'-dipivaloylpinoresinol ( <b>7</b> ) in CDCl <sub>3</sub> .....                | S29 |
| <sup>13</sup> C NMR spectrum of (+)-4,4'-dipivaloylpinoresinol ( <b>7</b> ) in CDCl <sub>3</sub> .....               | S29 |
| COSY spectrum of (+)-4,4'-dipivaloylpinoresinol ( <b>7</b> ) in CDCl <sub>3</sub> .....                              | S30 |
| HSQC spectrum of (+)-4,4'-dipivaloylpinoresinol ( <b>7</b> ) in CDCl <sub>3</sub> .....                              | S30 |
| HMBC spectrum of (+)-4,4'-dipivaloylpinoresinol ( <b>7</b> ) in CDCl <sub>3</sub> .....                              | S31 |

|                                                                                                                                                                                      |     |
|--------------------------------------------------------------------------------------------------------------------------------------------------------------------------------------|-----|
| ROESY spectrum of (+)-4,4'-dipivaloylpinoresinol ( <b>7</b> ) in CDCl <sub>3</sub> .....                                                                                             | S31 |
| UHPLC–MS data of salicifolol ( <b>1</b> ).....                                                                                                                                       | S32 |
| UHPLC–MS data of (+)-pinoresinol ( <b>2</b> ).....                                                                                                                                   | S33 |
| UHPLC–MS data of (+)-eudesmin ( <b>3</b> ).....                                                                                                                                      | S34 |
| UHPLC–MS data of (+)-phillygenin ( <b>4</b> ).....                                                                                                                                   | S35 |
| UHPLC–MS data of (+)-5,5'-dibromopinoresinol ( <b>5</b> ).....                                                                                                                       | S36 |
| UHPLC–MS data of (+)-4,4'-di(3,3-dimethylbutanoyl)pinoresinol ( <b>6</b> ).....                                                                                                      | S37 |
| UHPLC–MS data of (+)-4,4'-dipivaloylpinoresinol ( <b>7</b> ).....                                                                                                                    | S38 |
| HRESIMS of (+)-pinoresinol ( <b>2</b> ).....                                                                                                                                         | S39 |
| HRESIMS of (+)-eudesmin ( <b>3</b> ).....                                                                                                                                            | S40 |
| HRESIMS of (+)-phillygenin ( <b>4</b> ).....                                                                                                                                         | S41 |
| HRESIMS of (+)-5,5'-dibromopinoresinol ( <b>5</b> ).....                                                                                                                             | S42 |
| HRESIMS of (+)-4,4'-di(3,3-dimethylbutanoyl)pinoresinol ( <b>6</b> ).....                                                                                                            | S43 |
| HRESIMS of (+)-4,4'-dipivaloylpinoresinol ( <b>7</b> ).....                                                                                                                          | S44 |
| NMR data comparison for (+)-5,5'-dibromopinoresinol ( <b>5</b> ) and previously synthesised and reported racemic (±)-5,5'-dibromopinoresinol in acetone- <i>d</i> <sub>6</sub> ..... | S45 |
| <sup>1</sup> H NMR spectrum of (+)-5,5'-dibromopinoresinol ( <b>5</b> ) in acetone- <i>d</i> <sub>6</sub> .....                                                                      | S46 |

NMR data for salicifoliol (**1**) in CDCl<sub>3</sub><sup>a</sup>

| Position | $\delta_{\text{H}}$ , mult ( <i>J</i> in Hz) | $\delta_{\text{C}}$ , type | COSY        | HMBC         | ROESY   |
|----------|----------------------------------------------|----------------------------|-------------|--------------|---------|
| 1        |                                              | 130.8, C                   |             |              |         |
| 2        | 6.88 (d, 1.9)                                | 108.6, CH                  | 6           | 4,6,7        | 3-OMe,7 |
| 3        |                                              | 147.1, C                   |             |              |         |
| 3-OMe    | 3.91 (s)                                     | 56.1, CH <sub>3</sub>      |             | 3            | 2       |
| 4        |                                              | 146.0, C                   |             |              |         |
| 4-OH     | 5.65 (s)                                     |                            |             | 4,5,6        |         |
| 5        | 6.90 (d, 8.1)                                | 114.6, CH                  | 6           | 1,3          |         |
| 6        | 6.80 (dd, 8.1, 1.9)                          | 119.3, CH                  | 2,5         | 2,4,7        | 7       |
| 7        | 4.62 (d, 6.9)                                | 86.3, CH                   | 8           | 1,2,6,8,9,11 | 2,6,8   |
| 8        | 3.12 (dddd, 9.1, 6.9, 6.9, 2.2)              | 48.3, CH                   | 7,9a,9b, 11 | 1,7,11,10,12 | 6,9a,11 |
| 9a       | 4.50 (dd, 9.7, 6.9)                          | 70.0, CH <sub>2</sub>      | 8, 9b       | 7,8,10,11    | 8       |
| 9b       | 4.34 (dd, 9.7, 2.2)                          | 70.0, CH <sub>2</sub>      | 8, 9a       | 7,8,10,11    |         |
| 10       |                                              | 178.3, C                   |             |              |         |
| 11       | 3.44 (ddd, 9.1, 9.0, 3.8)                    | 46.2, CH                   | 8,12a, 12b  | 7,8,9,10,12  | 8, 12a  |
| 12a      | 4.35 (dd, 9.1, 9.0)                          | 70.1, CH <sub>2</sub>      | 11,12b      | 8,10,11      | 11      |
| 12b      | 4.18 (dd, 9.1, 3.8)                          | 70.1, CH <sub>2</sub>      | 11,12a      | 8,10,11      |         |

<sup>a</sup>Spectra recorded at 25 °C (800 MHz for <sup>1</sup>H and 200 MHz for <sup>13</sup>C).

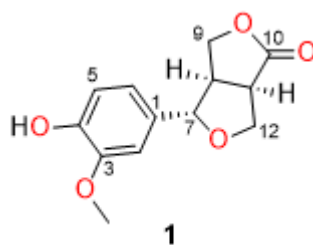

$^1\text{H}$  NMR spectrum of salicifoliol (**1**) in  $\text{CDCl}_3$

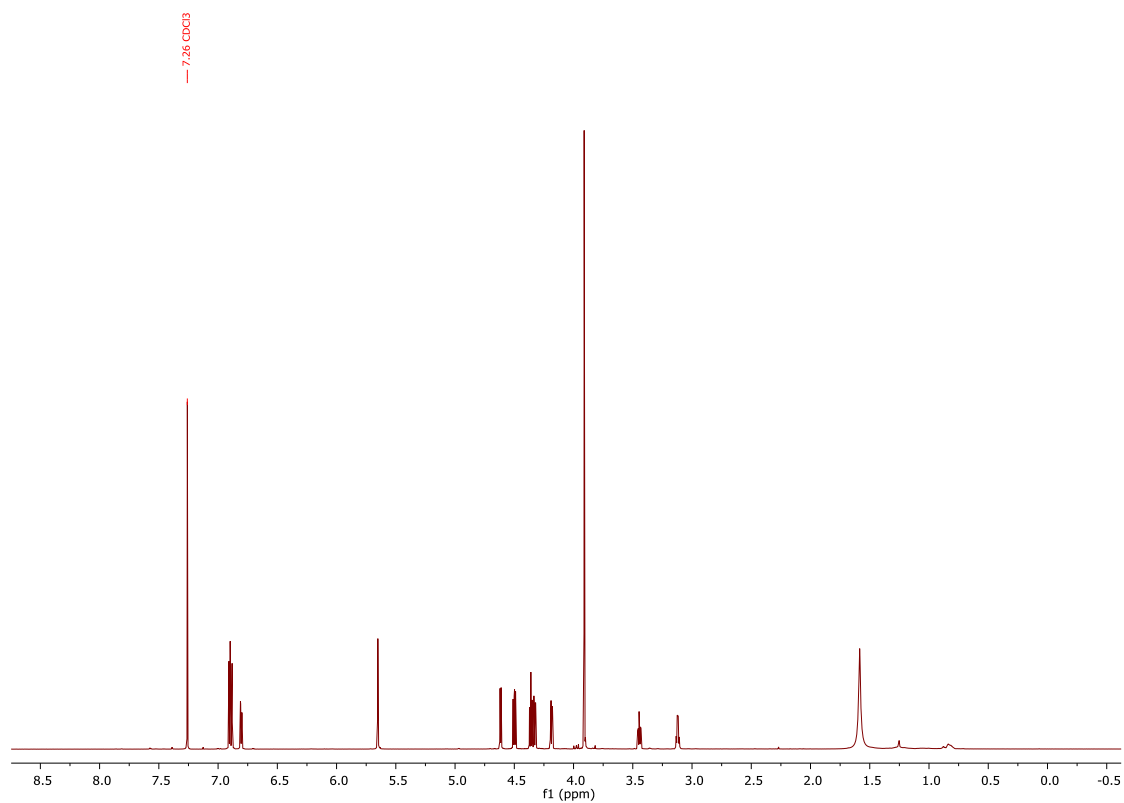

$^{13}\text{C}$  NMR spectrum of salicifoliol (**1**) in  $\text{CDCl}_3$

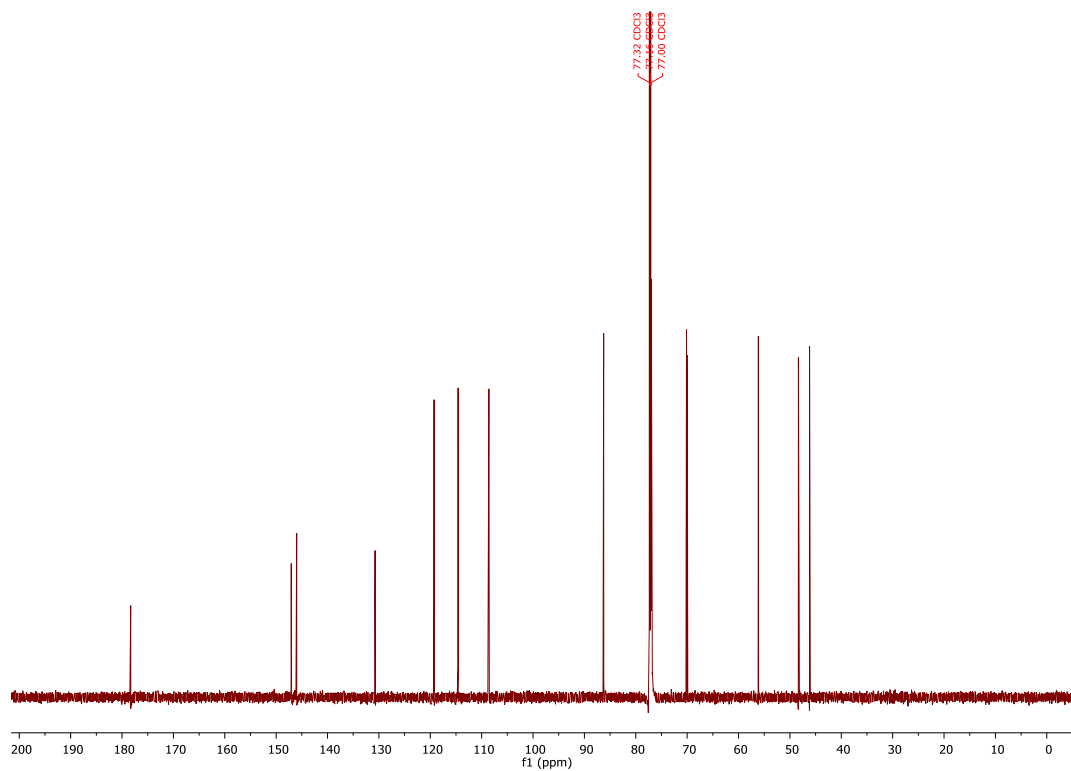

COSY spectrum of salicifoliol (1) in CDCl<sub>3</sub>

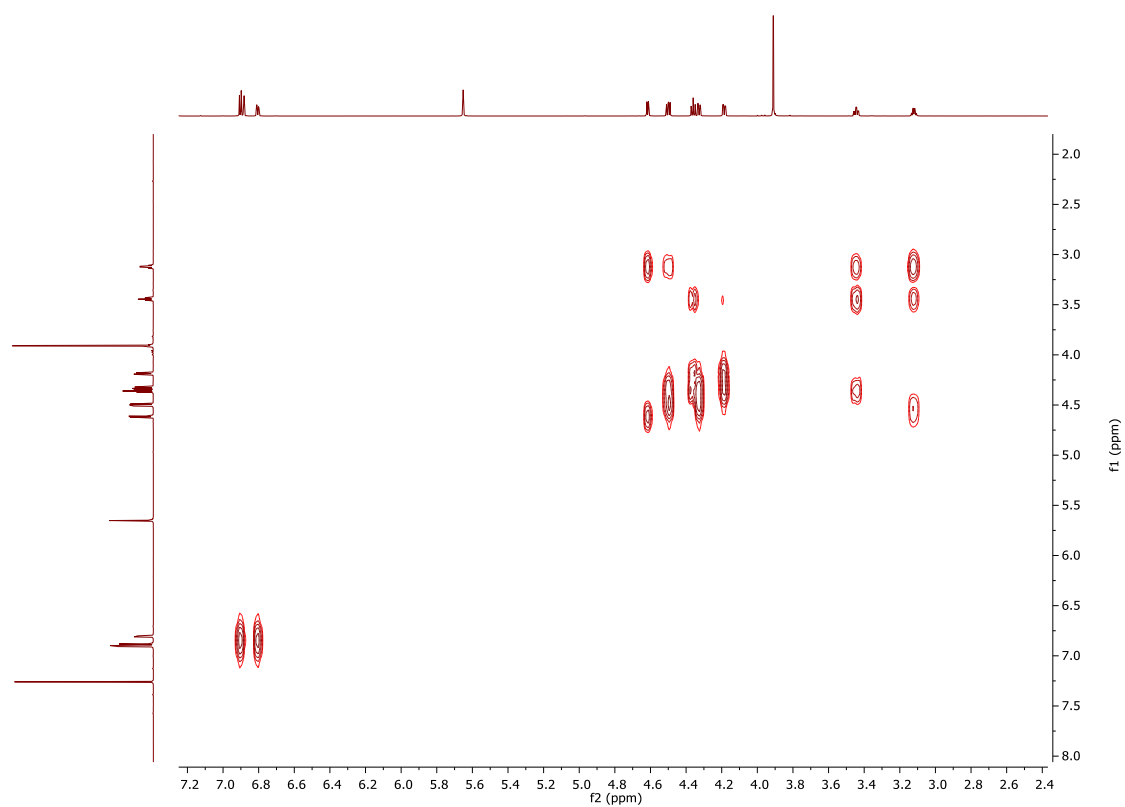

HSQC spectrum of salicifoliol (1) in CDCl<sub>3</sub>

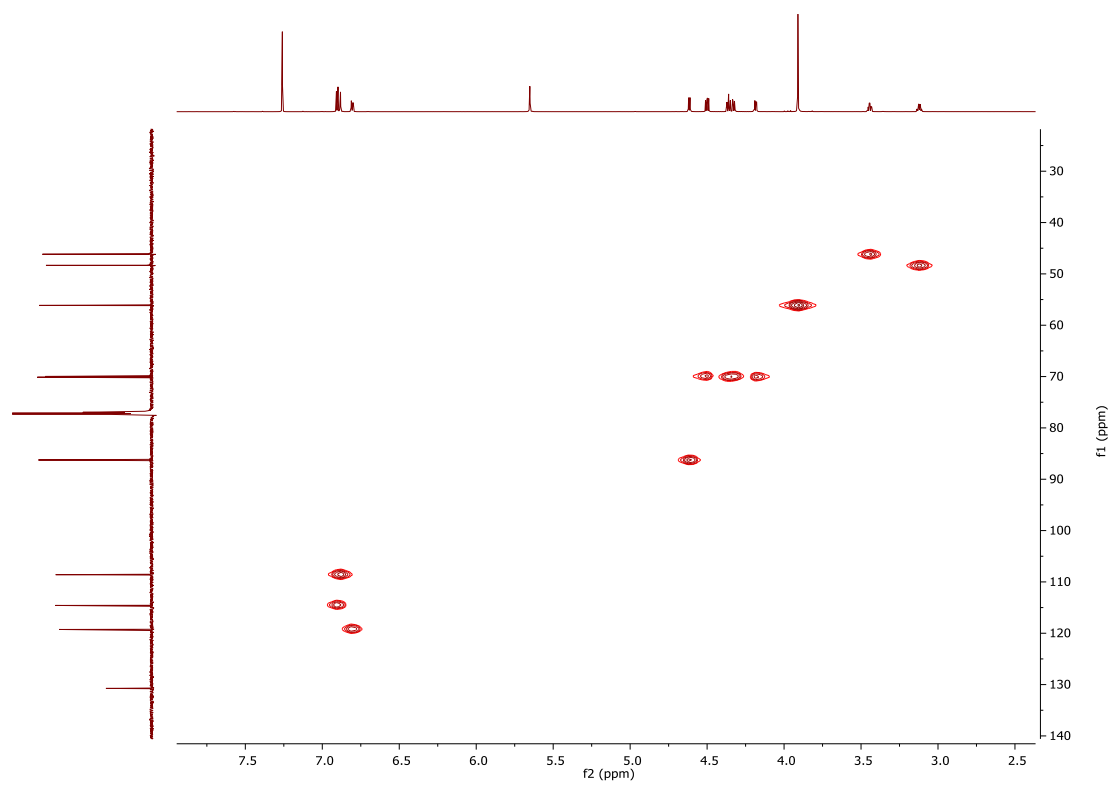

HMBC spectrum of salicifoliol (1) in CDCl<sub>3</sub>

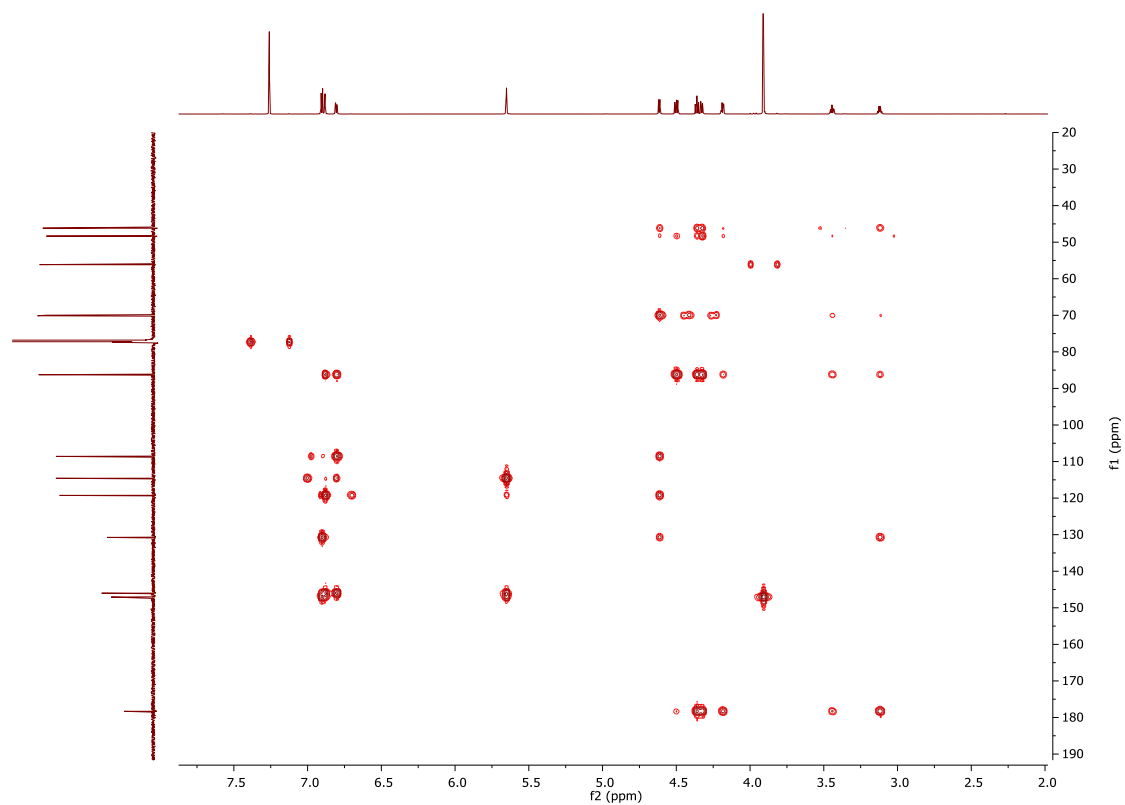

ROESY spectrum of salicifoliol (1) in CDCl<sub>3</sub>

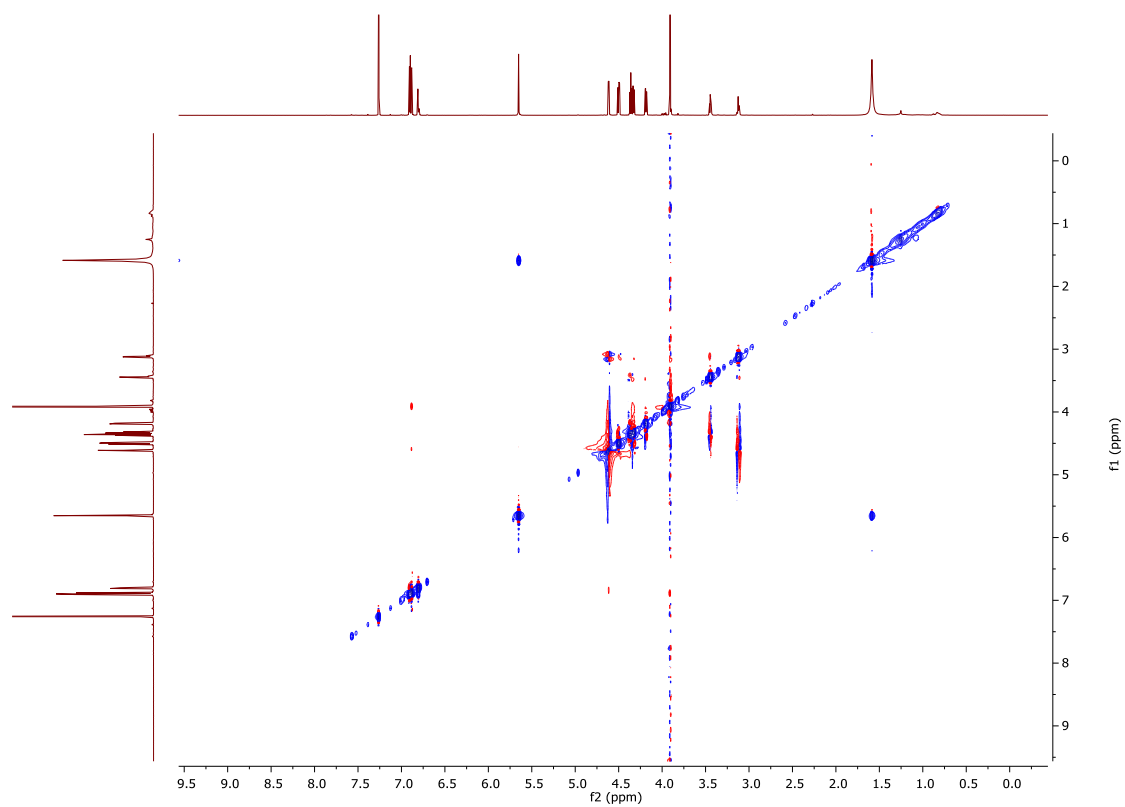

NMR data for (+)-pinoresinol (**2**) in CDCl<sub>3</sub><sup>a</sup>

| Position | $\delta_{\text{H}}$ , mult ( <i>J</i> in Hz) | $\delta_{\text{C}}$ , type | COSY         | HMBC                    | ROESY        |
|----------|----------------------------------------------|----------------------------|--------------|-------------------------|--------------|
| 1        |                                              | 132.9, C                   |              |                         |              |
| 2        | 6.90 (d, 1.9)                                | 108.8, CH                  | 6            | 4,6,7                   | 3-OMe,7,8    |
| 3        |                                              | 146.9, C                   |              |                         |              |
| 3-OMe    | 3.88 (s)                                     | 56.0, CH <sub>3</sub>      |              | 3                       | 2            |
| 4        |                                              | 145.3, C                   |              |                         |              |
| 4-OH     | 5.80 (br s)                                  |                            |              |                         |              |
| 5        | 6.88 (d, 8.0)                                | 114.4, CH                  | 6            | 1,3                     |              |
| 6        | 6.81 (dd, 8.0, 1.9)                          | 119.1, CH                  | 2,5          | 2,4,7                   | 7,8          |
| 7        | 4.74 (d, 4.3)                                | 86.0, CH                   | 2,6,8        | 1,2,6,8,9               | 2,6,8,9b     |
| 8        | 3.11 (m)                                     | 54.2, CH                   | 7,9a,9b      | 1,7,9,7',8',9'          | 2,6,7,9a     |
| 9a       | 4.25 (m)                                     | 71.7, CH <sub>2</sub>      | 8, 9b        | 1 <sup>w</sup> ,7,8,7'  | 8,9b         |
| 9b       | 3.89 (dd, 9.3, 3.7)                          |                            | 8, 9a        | 1 <sup>w</sup> ,7,8,7'  | 7,9a         |
| 1'       |                                              | 132.9, C                   |              |                         |              |
| 2'       | 6.90 (d, 1.9)                                | 108.8, CH                  | 6'           | 4',6',7'                | 3'-OMe,7',8' |
| 3'       |                                              | 146.9, C                   |              |                         |              |
| 3'-OMe   | 3.88 (s)                                     | 56.0, CH <sub>3</sub>      |              | 3'                      | 2'           |
| 4        |                                              | 145.3, C                   |              |                         |              |
| 4'-OH    | 5.80 (br s)                                  |                            |              |                         |              |
| 5'       | 6.88 (d, 8.0)                                | 114.4, CH                  | 6'           | 1',3'                   |              |
| 6'       | 6.81 (dd, 8.0, 1.9)                          | 119.1, CH                  | 2',5'        | 2',4',7'                | 7',8'        |
| 7'       | 4.74 (d, 4.3)                                | 86.0, CH                   | 2',6',8'     | 1',2',6',8',9'          | 2',6',8',9'b |
| 8'       | 3.11 (m)                                     | 54.2, CH                   | 7', 9'a, 9'b | 1',7',9',7,8,9          | 2',6',7',9'a |
| 9'a      | 4.25 (m)                                     | 71.7, CH <sub>2</sub>      | 8', 9'b      | 1 <sup>w</sup> ,7',8',7 | 8',9'b       |
| 9'b      | 3.89 (dd, 9.3, 3.7)                          |                            | 8', 9'a      | 1 <sup>w</sup> ,7',8',7 | 7',9'a       |

<sup>a</sup>Spectra recorded at 25 °C (800 MHz for <sup>1</sup>H and 200 MHz for <sup>13</sup>C); <sup>w</sup>weak correlation.

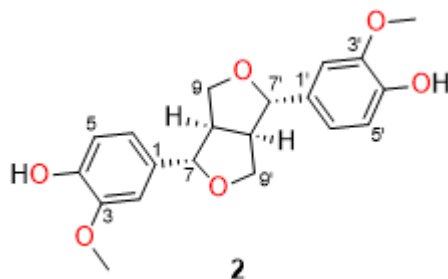

<sup>1</sup>H NMR spectrum of (+)-pinoresinol (**2**) in CDCl<sub>3</sub>

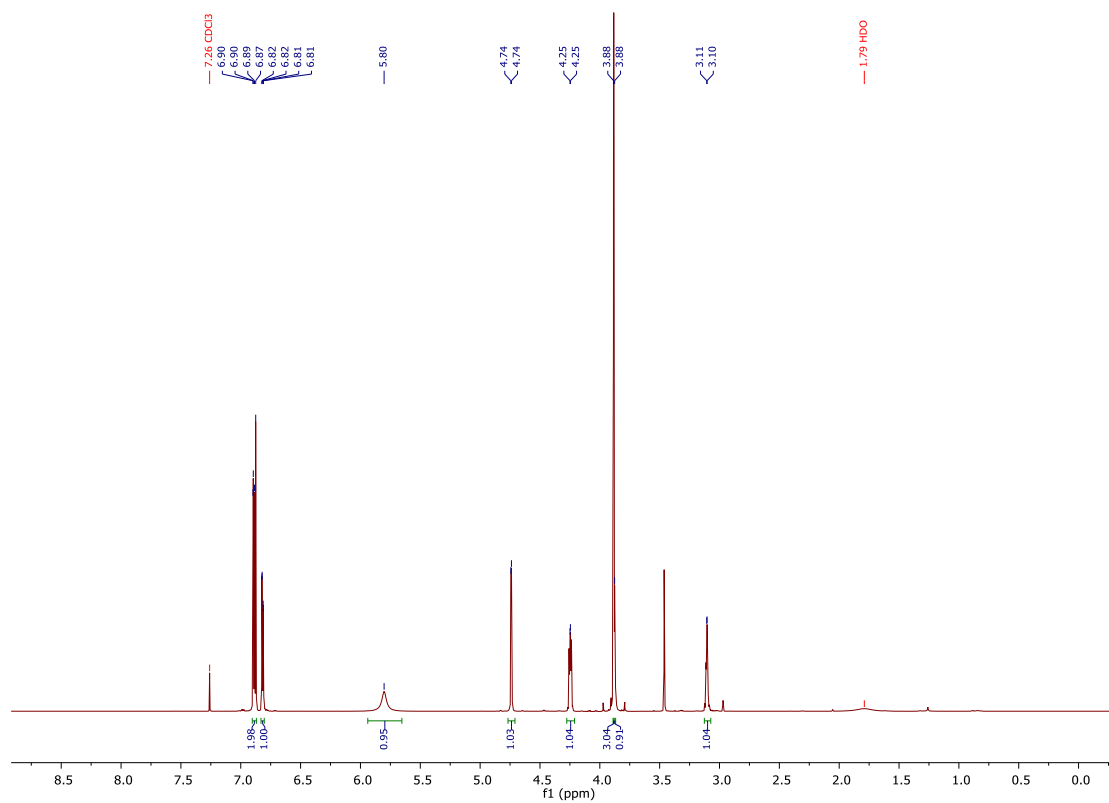

<sup>13</sup>C NMR spectrum of (+)-pinoresinol (**2**) in CDCl<sub>3</sub>

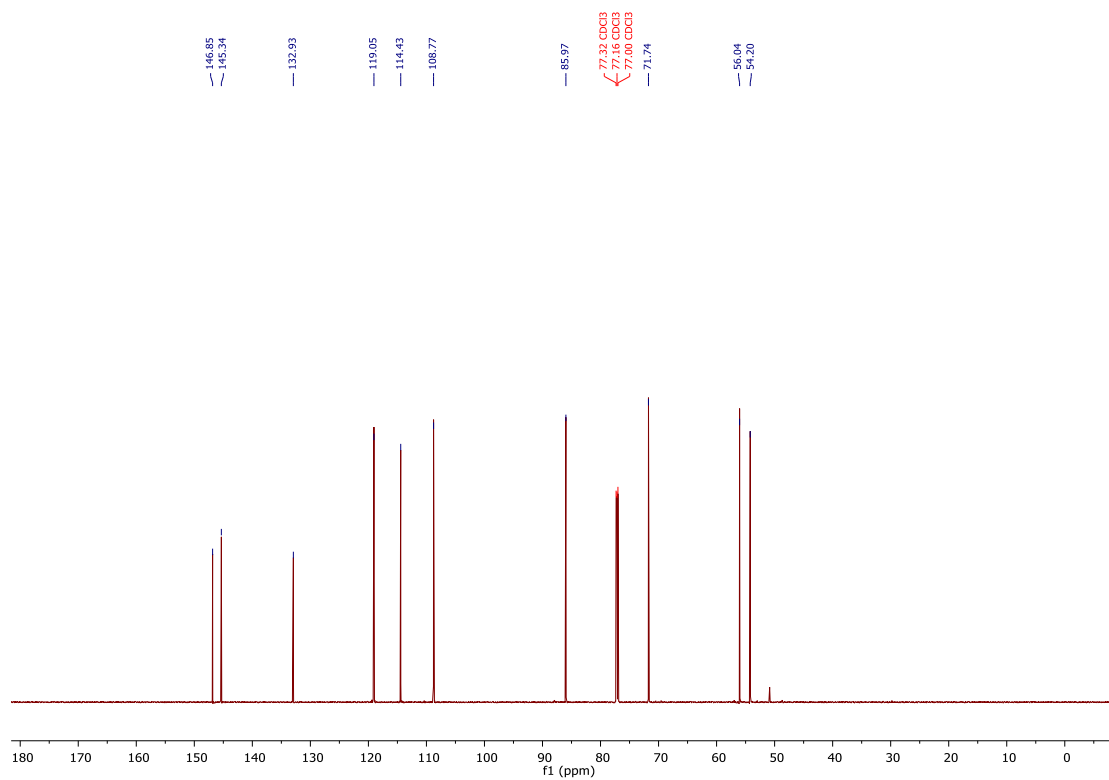

COSY spectrum of (+)-pinoresinol (**2**) in CDCl<sub>3</sub>

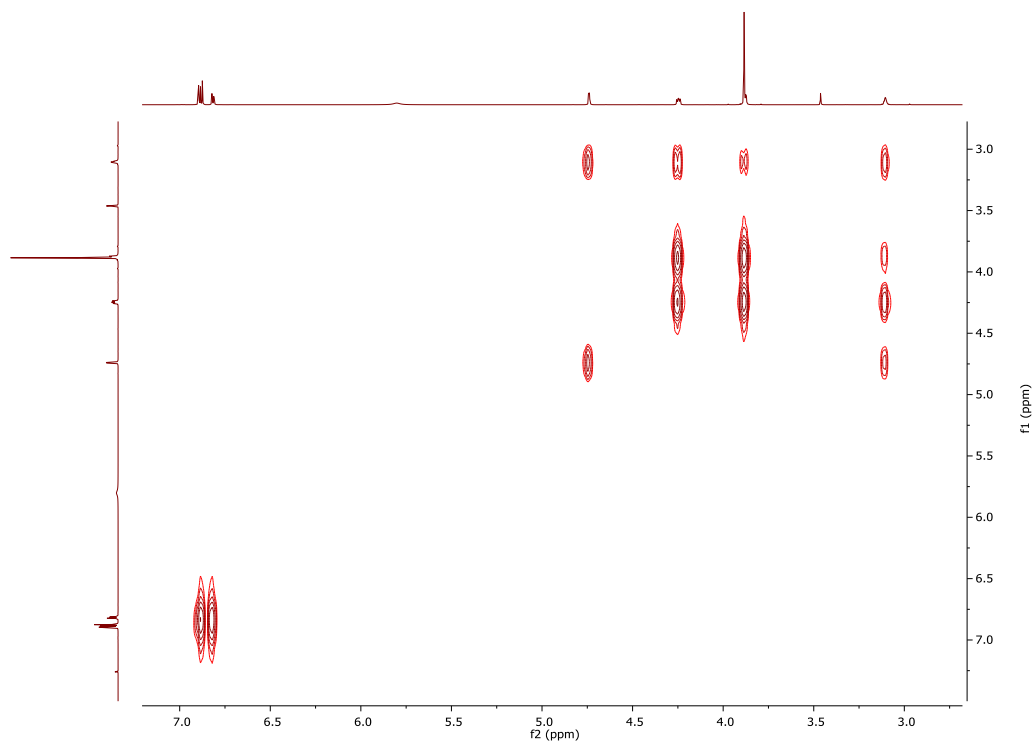

HSQC spectrum of (+)-pinoresinol (**2**) in CDCl<sub>3</sub>

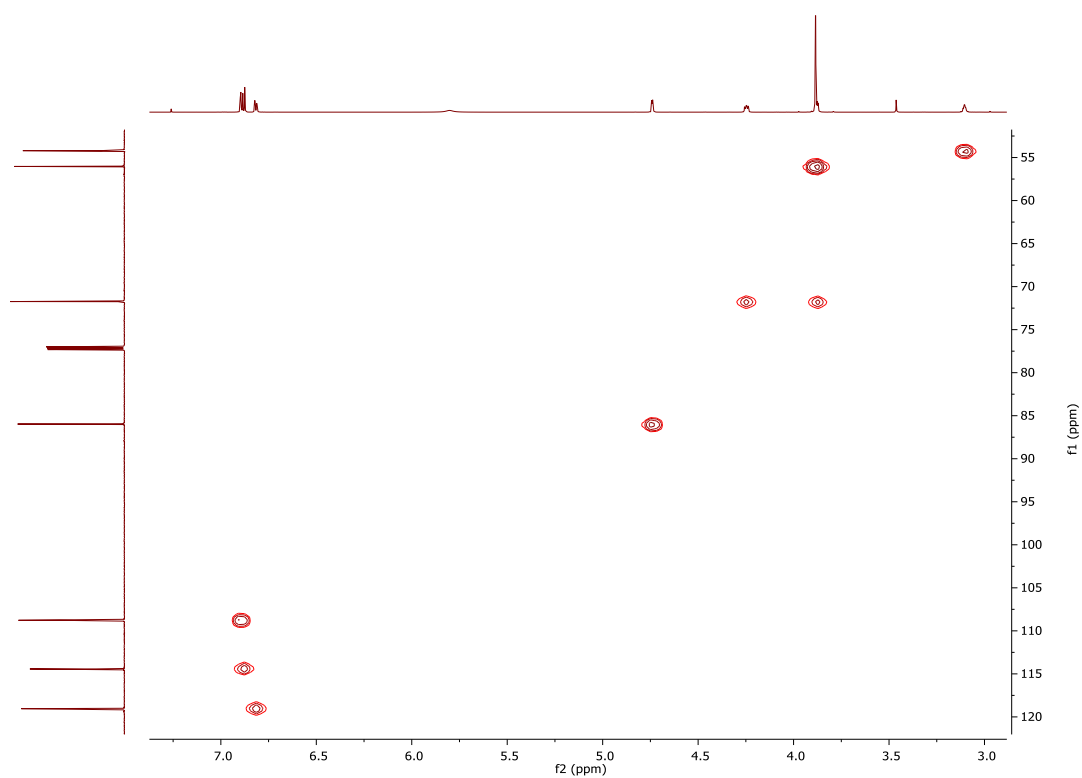

HMBC spectrum of (+)-pinoresinol (**2**) in CDCl<sub>3</sub>

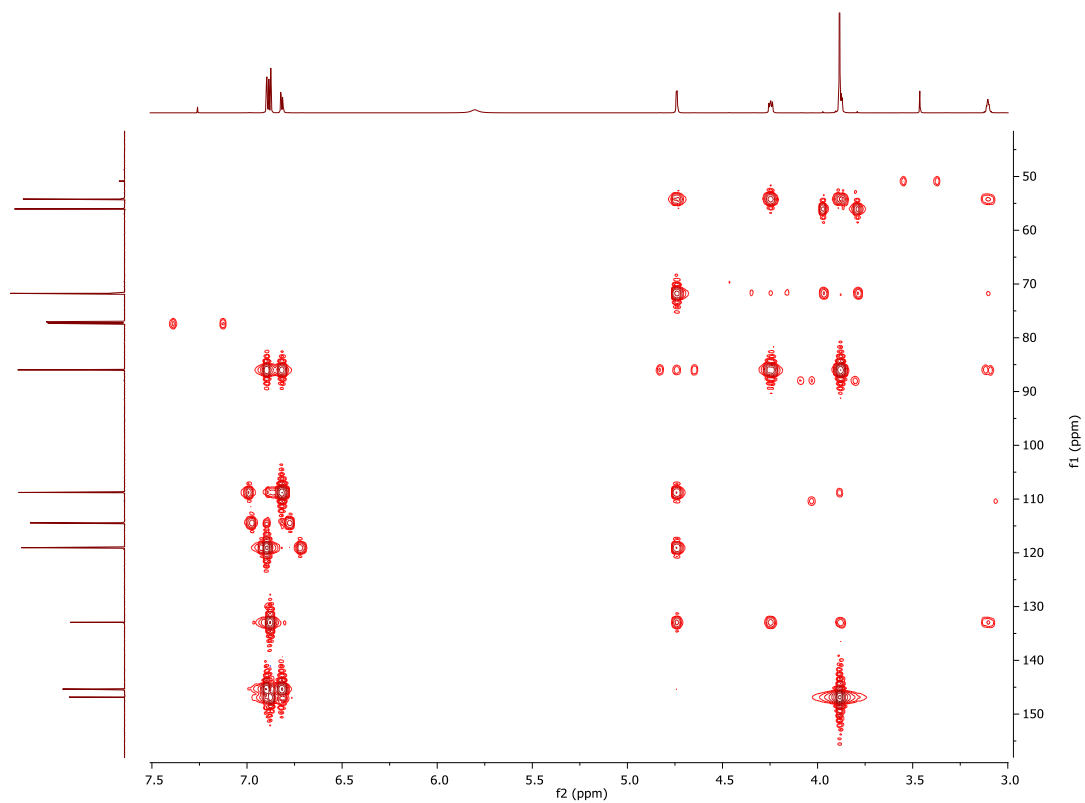

ROESY spectrum of (+)-pinoresinol (**2**) in CDCl<sub>3</sub>

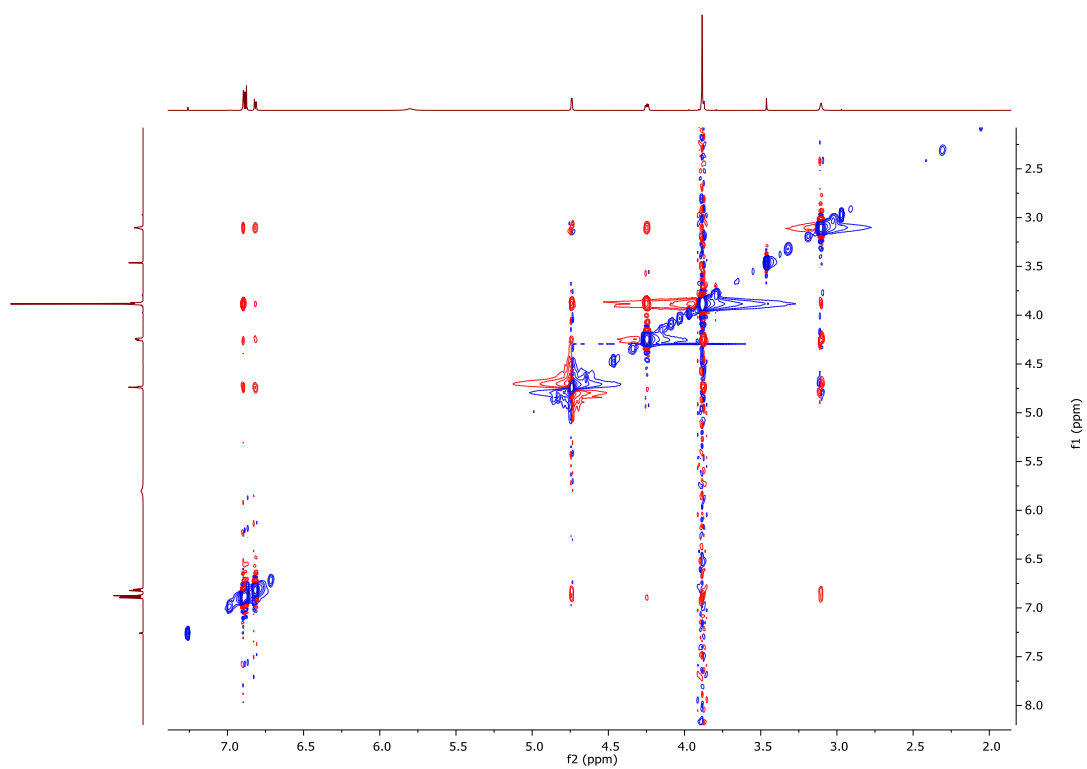

NMR data for (+)-eudesmin (**3**) in CDCl<sub>3</sub><sup>a</sup>

| Position | $\delta_{\text{H}}$ , mult ( <i>J</i> in Hz) | $\delta_{\text{C}}$ , type           | COSY       | HMBC           | ROESY        |
|----------|----------------------------------------------|--------------------------------------|------------|----------------|--------------|
| 1        |                                              | 133.7, C                             |            |                |              |
| 2        | 6.91 (d, 1.8)                                | 109.4, CH                            | 6,7        | 1,4,6,7        | 3-OMe,7,8    |
| 3        |                                              | 149.3, C                             |            |                |              |
| 3-OMe    | 3.90 (s)                                     | 56.09 <sup>b</sup> , CH <sub>3</sub> |            | 3              | 2            |
| 4        |                                              | 148.8, C                             |            |                |              |
| 4-OMe    | 3.87 (s)                                     | 56.06 <sup>b</sup> , CH <sub>3</sub> |            | 4              | 5            |
| 5        | 6.85 (d, 8.1)                                | 111.2, CH                            | 6          | 1,3            | 4-OMe,7,8    |
| 6        | 6.88 (dd, 8.1, 1.8)                          | 118.4, CH                            | 2,7        | 2,4,7          | 7,8,9a       |
| 7        | 4.76 (d, 4.3)                                | 85.9, CH                             | 2,6,8      | 1,2,6,8,9      | 2,6,8,9b     |
| 8        | 3.11 (m)                                     | 54.3, CH                             | 7,9a,9b    | 1,7,9,7',8',9' | 2,6          |
| 9a       | 4.26 (m)                                     | 71.9, CH <sub>2</sub>                | 8, 9b      | 7,8,7'         | 2,6,8        |
| 9b       | 3.89 (dd, 9.4, 4.2)                          | 71.9, CH <sub>2</sub>                | 8, 9a      | 7,8,7'         | 7            |
| 1'       |                                              | 133.7, C                             |            |                |              |
| 2'       | 6.91 (d, 1.8)                                | 109.4, CH                            | 7'         | 1',4',6',7'    | 3'-OMe,7',8' |
| 3'       |                                              | 149.3, C                             |            |                |              |
| 3'-OMe   | 3.90 (s)                                     | 56.09 <sup>b</sup> , CH <sub>3</sub> |            | 3'             | 2'           |
| 4'       |                                              | 148.8, C                             |            |                |              |
| 4'-OMe   | 3.87 (s)                                     | 56.06 <sup>b</sup> , CH <sub>3</sub> |            | 4'             | 5'           |
| 5'       | 6.85 (d, 8.1)                                | 111.2, CH                            |            | 1',3'          | 4'-OMe,7',8' |
| 6'       | 6.88 (dd, 8.1, 1.8)                          | 118.4, CH                            | 7'         | 2',4',7'       | 7',8',9'a    |
| 7'       | 4.76 (d, 4.3)                                | 85.9, CH                             | 2',6',8'   | 1',2',6',8',9' | 2',6',8',9'b |
| 8'       | 3.11 (m)                                     | 54.3, CH                             | 7',9'a,9'b | 1',7',9',7,8,9 | 2',6'        |
| 9'a      | 4.26 (m)                                     | 71.9, CH <sub>2</sub>                | 8', 9'b    | 7',8',7        | 2',6',8'     |
| 9'b      | 3.89 (dd, 9.4, 4.2)                          | 71.9, CH <sub>2</sub>                | 8', 9'a    | 7',8',7        | 7'           |

<sup>a</sup>Spectra recorded at 25 °C (800 MHz for <sup>1</sup>H and 200 MHz for <sup>13</sup>C); <sup>b</sup>interchangeable signal.

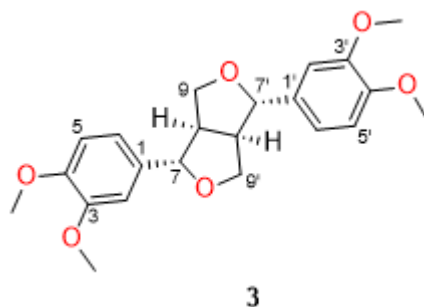

<sup>1</sup>H NMR spectrum of (+)-eudesmin (**3**) in CDCl<sub>3</sub>

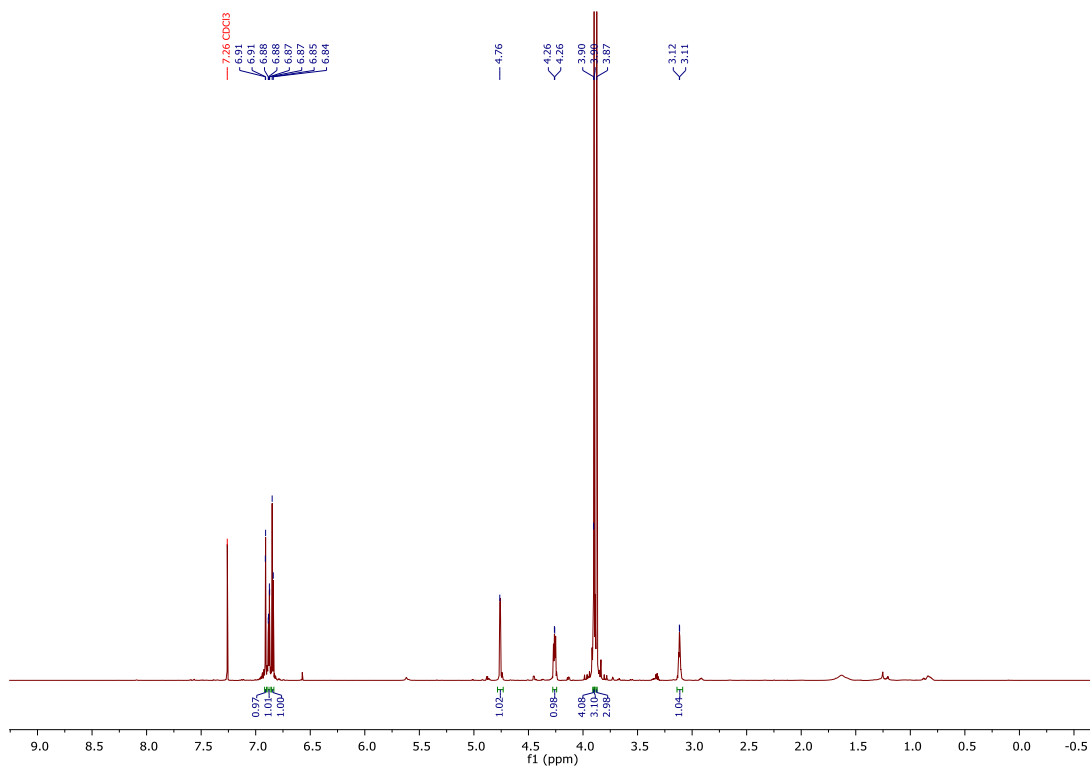

<sup>13</sup>C NMR spectrum of (+)-eudesmin (**3**) in CDCl<sub>3</sub>

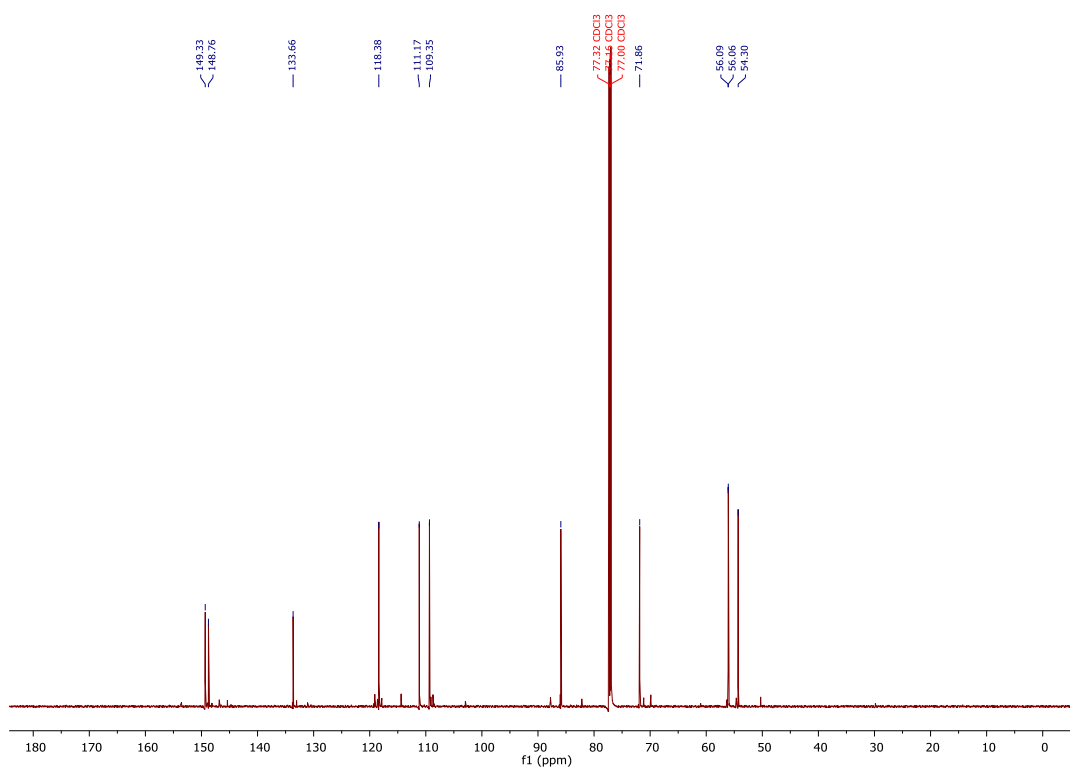

COSY spectrum of (+)-eudesmin (**3**) in CDCl<sub>3</sub>

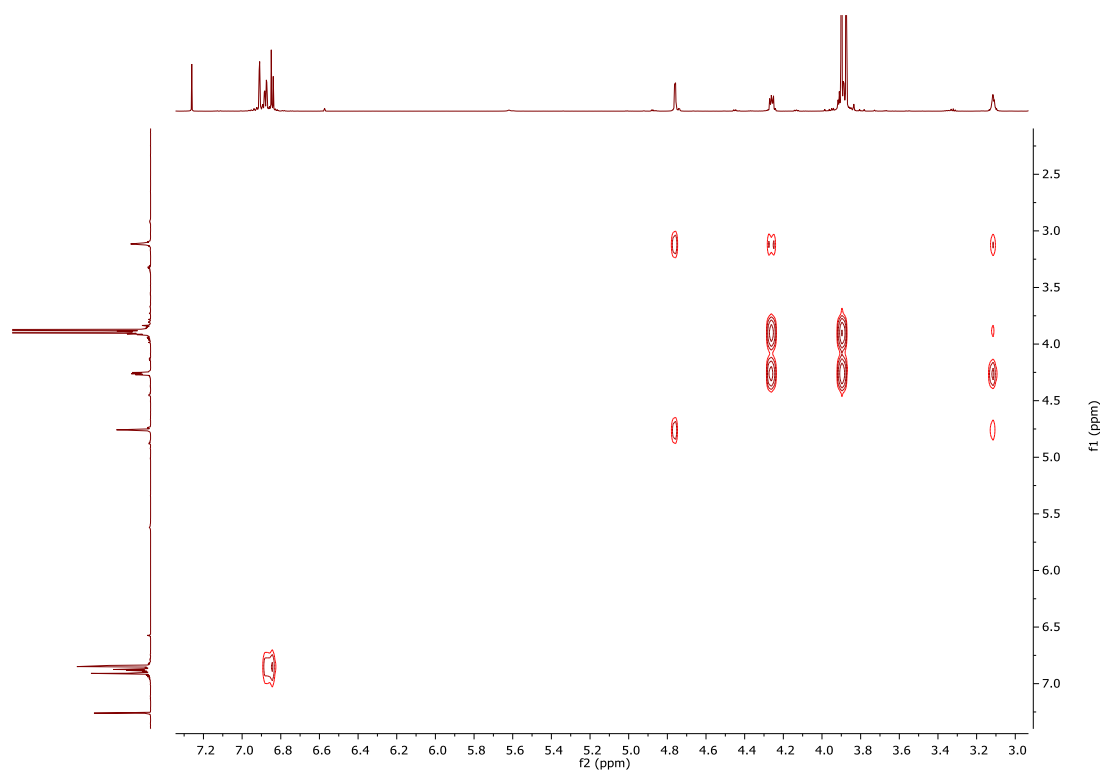

HSQC spectrum of (+)-eudesmin (**3**) in CDCl<sub>3</sub>

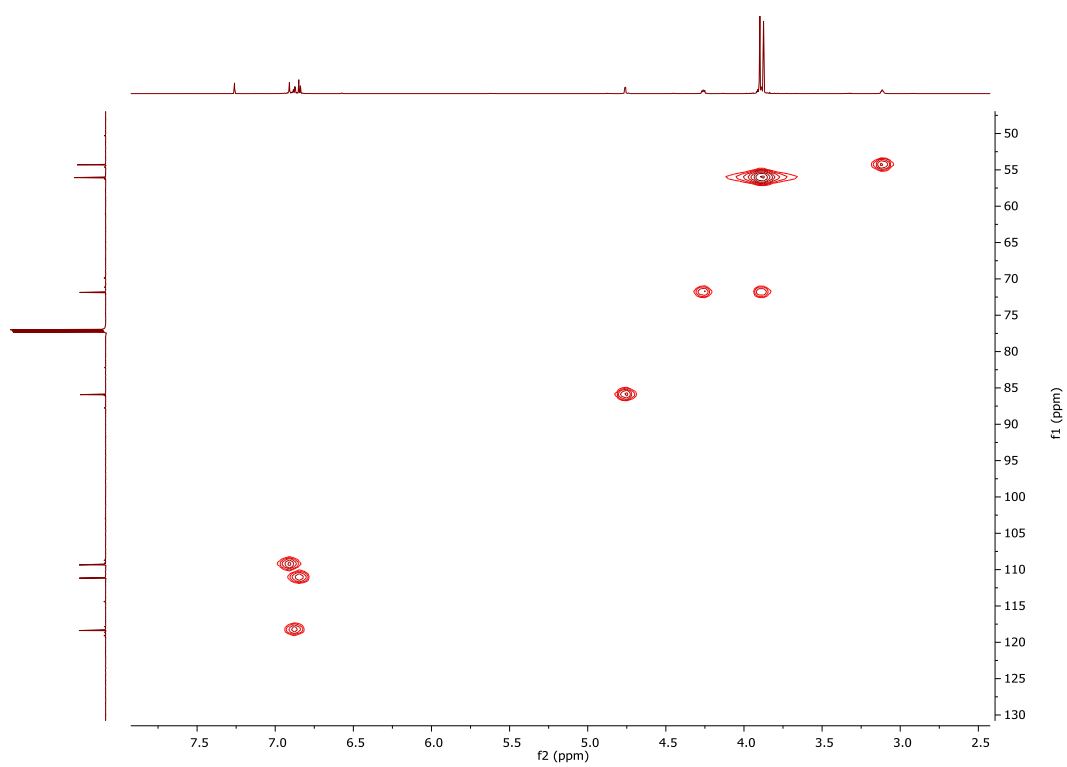

HMBC spectrum of (+)-eudesmin (**3**) in CDCl<sub>3</sub>

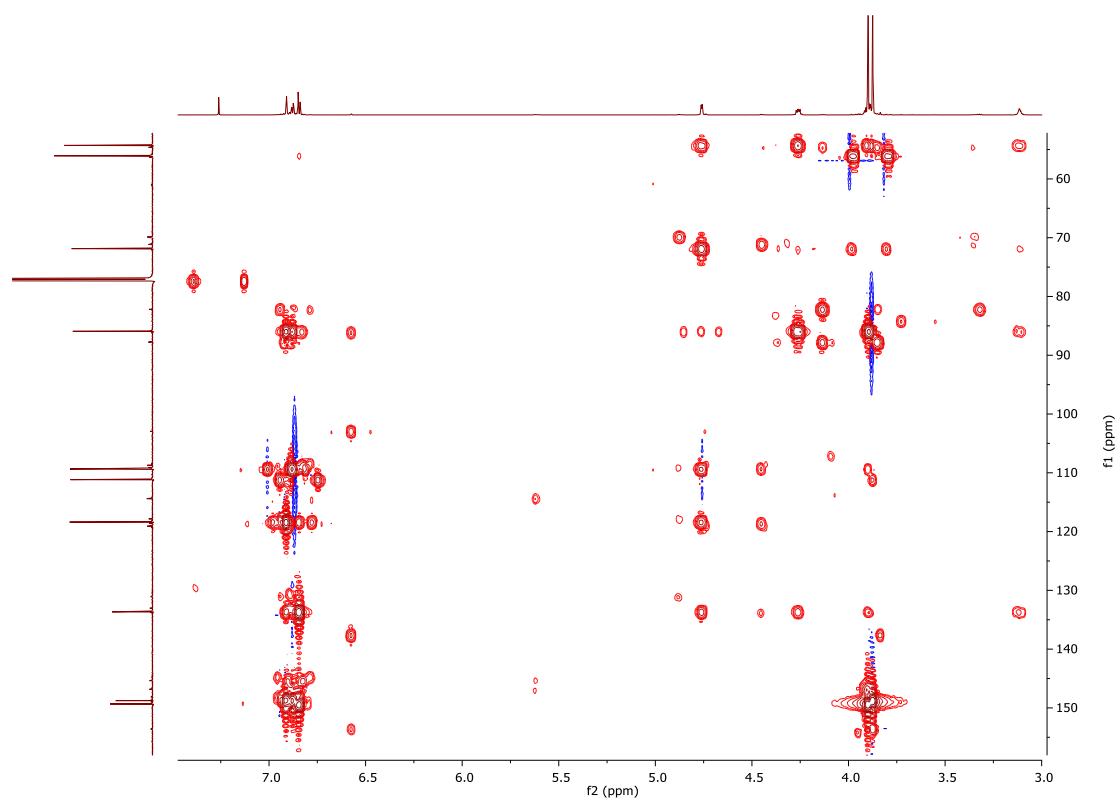

ROESY spectrum of (+)-eudesmin (**3**) in CDCl<sub>3</sub>

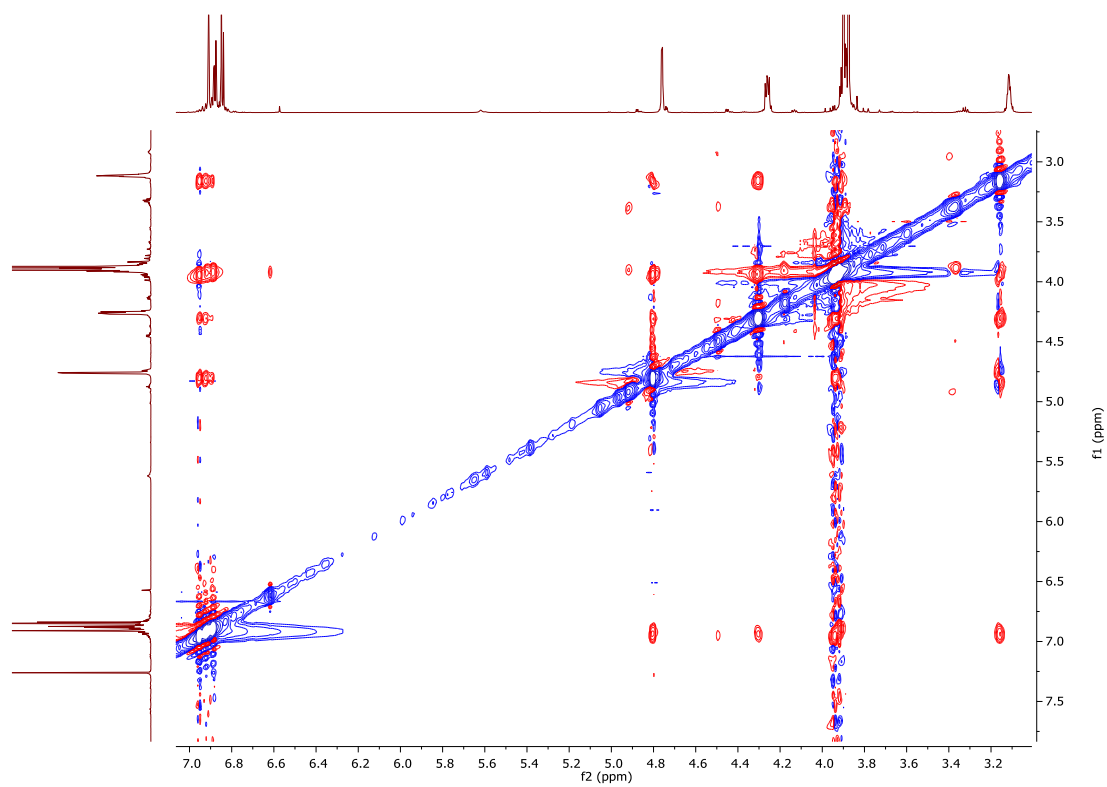

NMR data for (+)-phillygenin (**4**) in CDCl<sub>3</sub><sup>a</sup>

| Position | $\delta_{\text{H}}$ , mult (J in Hz) | $\delta_{\text{C}}$ , type           | COSY       | HMBC                           | ROESY         |
|----------|--------------------------------------|--------------------------------------|------------|--------------------------------|---------------|
| 1        |                                      | 133.1, C                             |            |                                |               |
| 2        | 6.90 (d, 1.8)                        | 109.4, CH                            | 6          | 4,6,7                          | 3-OMe,7,8     |
| 3        |                                      | 146.8, C                             |            |                                |               |
| 3-OMe    | 3.91 (s)                             | 56.11 <sup>b</sup> , CH <sub>3</sub> |            | 3                              | 2             |
| 4        |                                      | 145.4, C                             |            |                                |               |
| 4-OH     | 5.60 (s)                             |                                      |            | 3,4,5                          |               |
| 5        | 6.89 (d, 8.0)                        | 114.4, CH                            | 6          | 1,3                            |               |
| 6        | 6.82 (dd, 8.0, 1.8)                  | 119.1, CH                            | 2,5        | 2,4,7                          | 7,8           |
| 7        | 4.74 (d, 4.5)                        | 86.0, CH                             | 8          | 2,9                            | 2,8,9b        |
| 8        | 3.11 (m)                             | 54.32 <sup>c</sup> , C               | 7,9a,9b    | 7 <sup>w</sup> ,8 <sup>w</sup> | 2,7,9a,9b     |
| 9a       | 4.26 (m)                             |                                      | 8,9b       | 7,8,7'                         | 2,8           |
| 9b       | 3.89 (m)                             | 71.9, CH <sub>2</sub>                | 8,9a       | 7,8,7'                         | 7,8           |
| 1'       |                                      | 133.7, C                             |            |                                |               |
| 2'       | 6.91 (d, 1.8)                        | 108.7, CH                            | 6'         | 4',6',7'                       | 3'-OMe,7',8'  |
| 3'       |                                      | 149.3, C                             |            |                                |               |
| 3'-OMe   | 3.90 (s)                             | 56.11 <sup>b</sup> , CH <sub>3</sub> |            | 3'                             | 2'            |
| 4        |                                      | 148.8, C                             |            |                                |               |
| 4'-OMe   | 3.88 (s)                             | 56.08 <sup>b</sup> , CH <sub>3</sub> |            | 4'                             | 5'            |
| 5'       | 6.84 (d, 8.2)                        | 111.2, CH                            | 6'         | 1',3'                          |               |
| 6'       | 6.87 (dd, 8.2, 1.8)                  | 118.4, CH                            | 2',5'      | 2',4',7'                       | 7',8'         |
| 7'       | 4.76 (d, 4.5)                        | 85.9, CH                             | 8'         | 2',9'                          |               |
| 8'       | 3.10 (m)                             | 54.31 <sup>c</sup> , C               | 7',9'a,9'b | 7 <sup>w</sup> ,8 <sup>w</sup> | 2',7',9'a,9'b |
| 9'a      | 4.25 (m)                             |                                      | 8',9'b     | 7',8',7                        | 2',8'         |
| 9'b      | 3.87 (m)                             | 71.8, CH <sub>2</sub>                | 8',9'a     | 7',8',7                        | 7',8'         |

<sup>a</sup>Spectra recorded at 25 °C (800 MHz for <sup>1</sup>H and 200 MHz for <sup>13</sup>C); <sup>b,c</sup>interchangeable signals; <sup>w</sup>weak correlation.

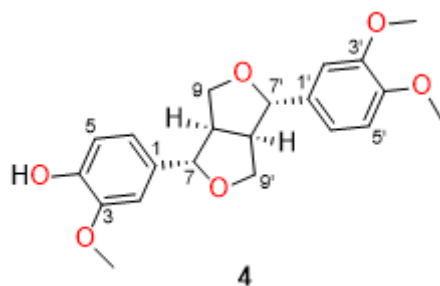

<sup>1</sup>H NMR spectrum of (+)-phillygenin (4) in CDCl<sub>3</sub>

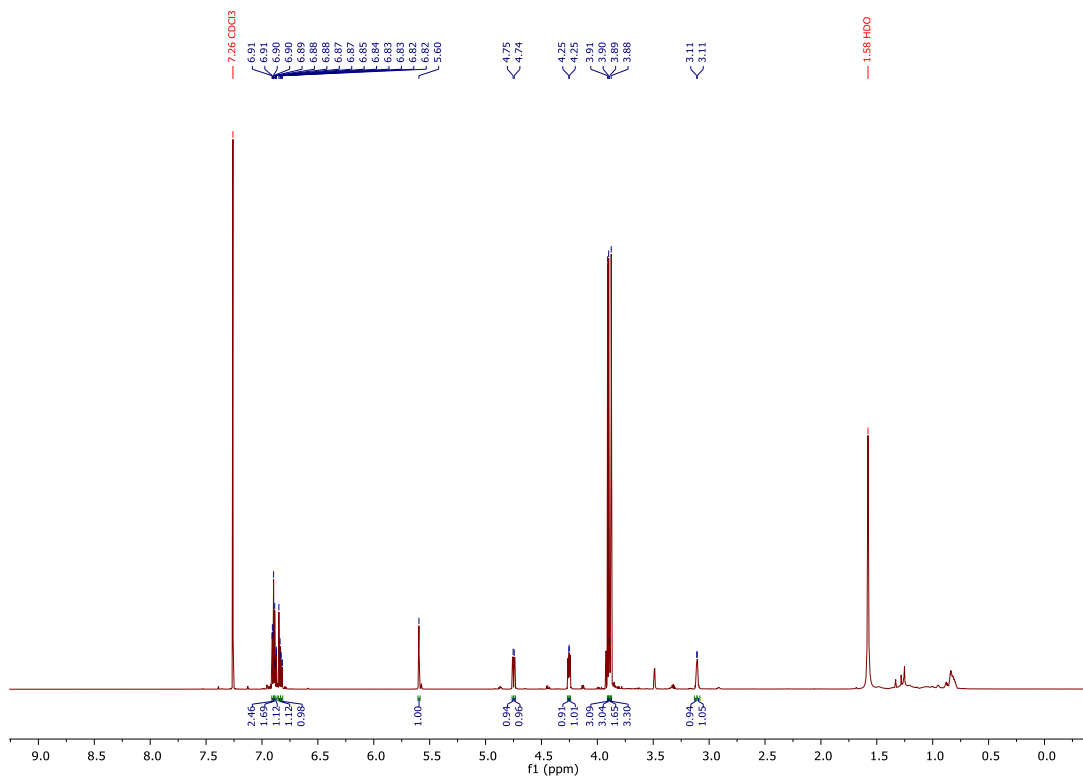

<sup>13</sup>C NMR spectrum of (+)-phillygenin (4) in CDCl<sub>3</sub>

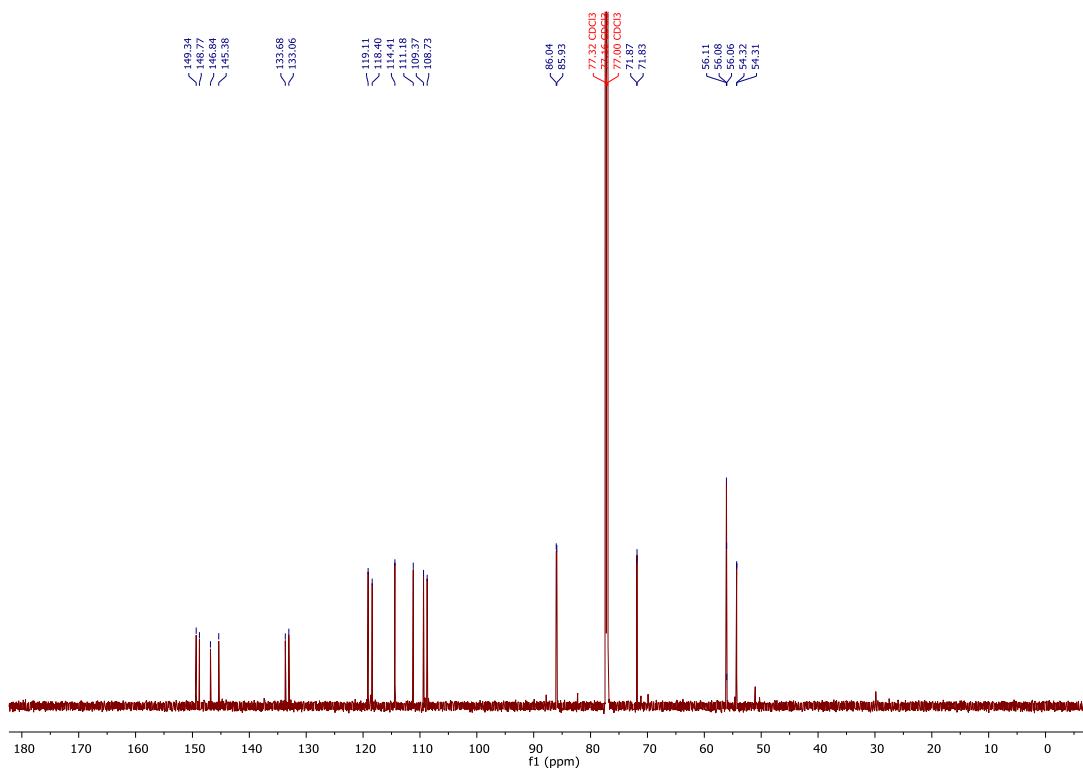

COSY spectrum of (+)-phillygenin (4) in CDCl<sub>3</sub>

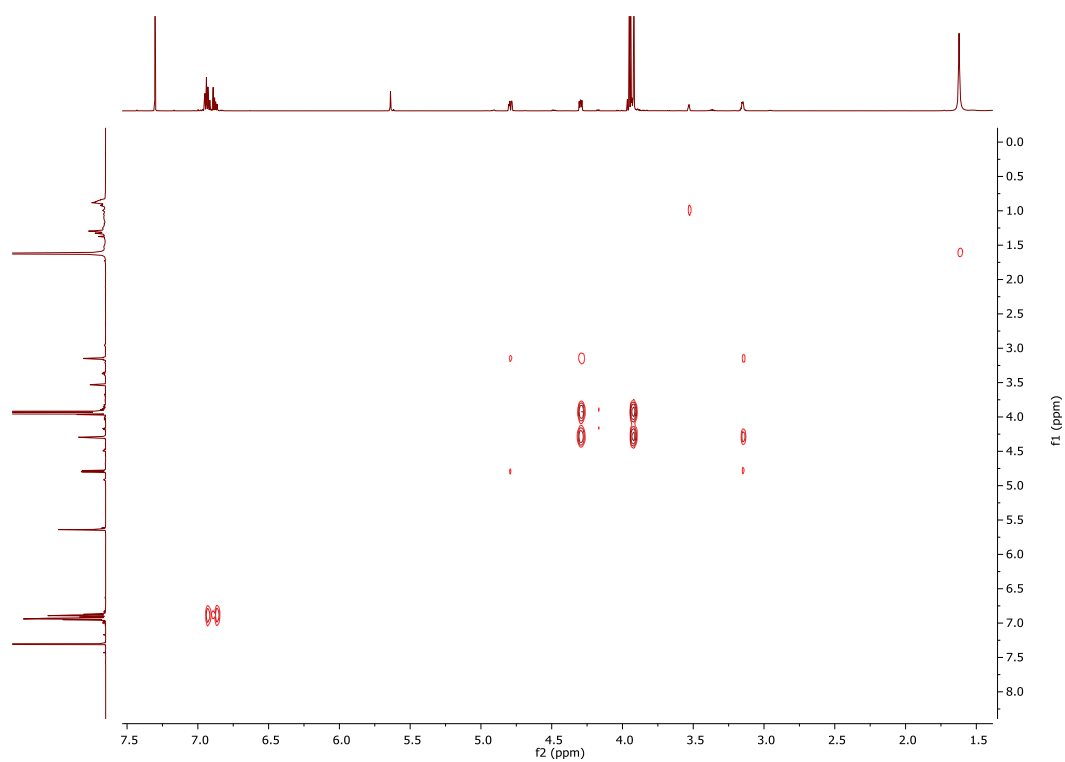

HSQC spectrum of (+)-phillygenin (4) in CDCl<sub>3</sub>

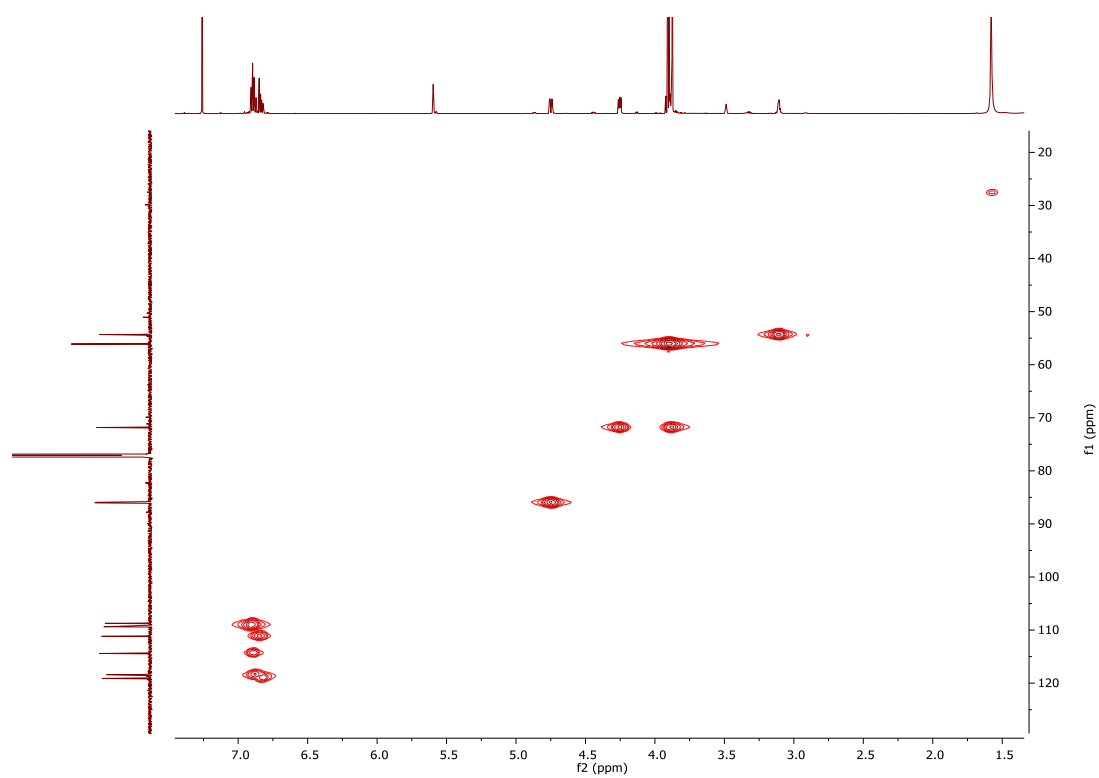

HMBC spectrum of (+)-phillygenin (4) in CDCl<sub>3</sub>

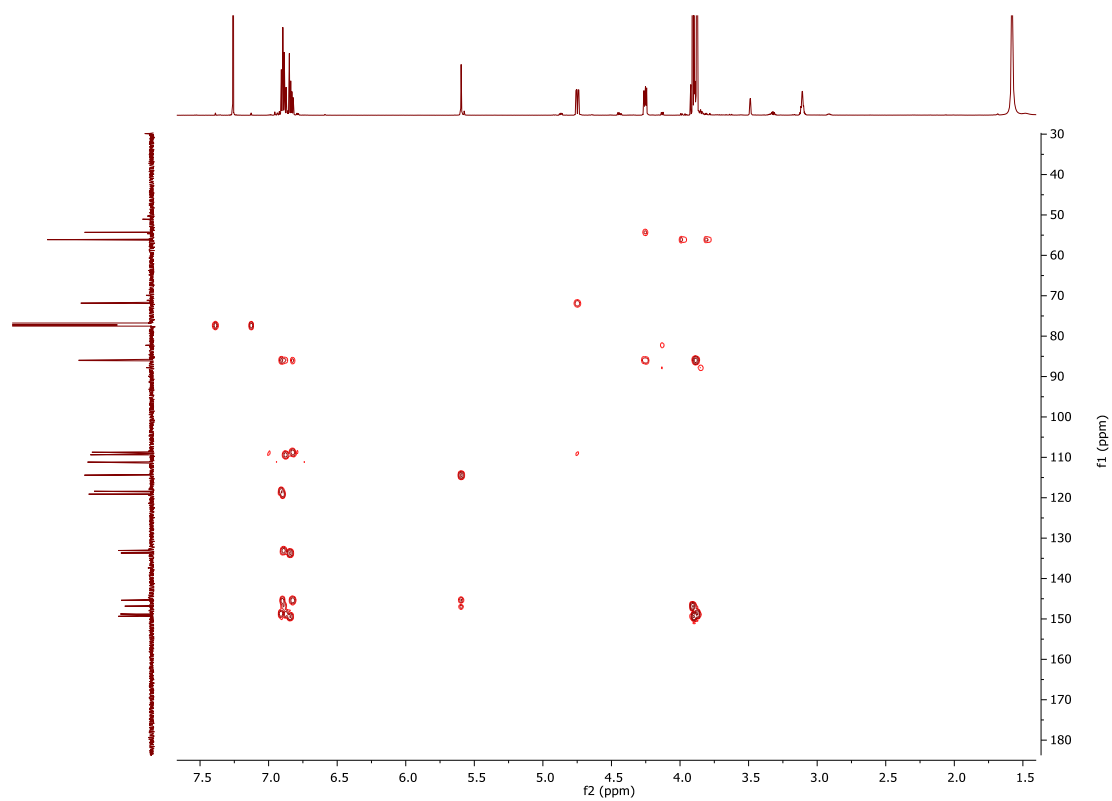

ROESY spectrum of (+)-phillygenin (4) in CDCl<sub>3</sub>

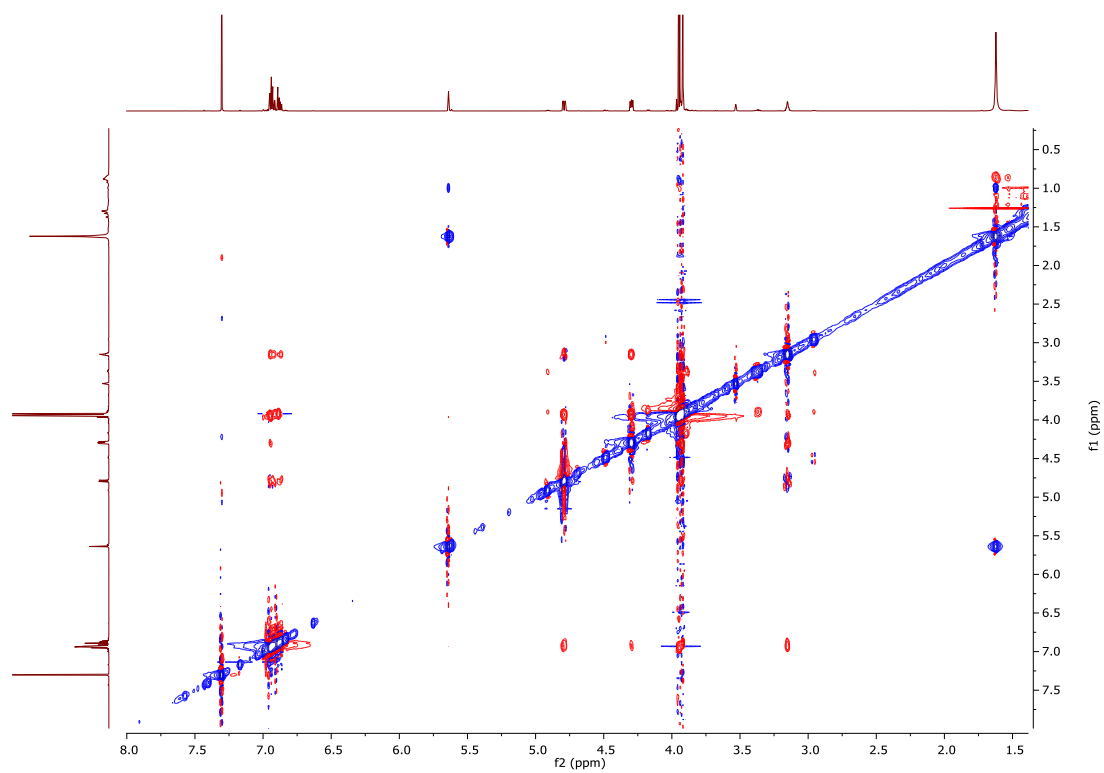

NMR data for (+)-5,5'-dibromopinoresinol (**5**) in CDCl<sub>3</sub><sup>a</sup>

| Position | $\delta_{\text{H}}$ (mult, J in Hz) | $\delta_{\text{C}}$ , type | COSY         | HMBC              | ROESY            |
|----------|-------------------------------------|----------------------------|--------------|-------------------|------------------|
| 1        |                                     | 133.3, C                   |              |                   |                  |
| 2        | 6.83 (d, 1.8)                       | 108.0, CH                  | 6,7          | 1,3,4,5,6,7       | 3-OMe,7,8,9a     |
| 3        |                                     | 147.6, C                   |              |                   |                  |
| 3-OMe    | 3.92 (s)                            | 56.6, CH <sub>3</sub>      |              | 3                 | 2                |
| 4        |                                     | 142.9, C                   |              |                   |                  |
| 4-OH     | <sup>b</sup>                        |                            |              |                   |                  |
| 5        |                                     | 108.4, C                   |              |                   |                  |
| 6        | 7.06 (dd, 1.8, 0.5)                 | 122.3, CH                  | 2,7          | 2,3,4,5,7         | 7,8,9a           |
| 7        | 4.75 (d, 4.2)                       | 85.4, CH                   | 2,6,8        | 1,2,6,8,9         | 2,6,8,9b         |
| 8        | 3.11 (m)                            | 53.9, CH                   | 7, 9a, 9b    | 1,7,9,7',8',9'    | 2,6,7,9a         |
| 9a       | 4.27 (m)                            |                            | 8, 9b        | 1,7,8,7'          | 2,6,8,9b         |
| 9b       | 3.90 (dd, 9.3, 3.6)                 | 71.8, CH <sub>2</sub>      | 8, 9a        | 7,7'              | 7                |
| 1'       |                                     | 133.3, C                   |              |                   |                  |
| 2'       | 6.83 (d, 1.8)                       | 108.0, CH                  | 6',7'        | 1',3',4',5',6',7' | 3'-OMe,7',8',9'a |
| 3'       |                                     | 147.6, C                   |              |                   |                  |
| 3'-OMe   | 3.92 (s)                            | 56.6, CH <sub>3</sub>      |              | 3'                | 2'               |
| 4'       |                                     | 142.9, C                   |              |                   |                  |
| 4'-OH    | <sup>b</sup>                        |                            |              |                   |                  |
| 5'       |                                     | 108.4, C                   |              |                   |                  |
| 6'       | 7.06 (dd, 1.8, 0.5)                 | 122.3, CH                  | 2',7'        | 2',3',4',5',7'    | 7',8',9'a        |
| 7'       | 4.75 (d, 4.2)                       | 85.4, CH                   | 2',6',8'     | 1',2',6',8',9'    | 2',6',8',9'b     |
| 8'       | 3.11 (m)                            | 53.9, CH                   | 7', 9'a, 9'b | 1',7',9',7,8,9    | 2',6',7',9'a     |
| 9'a      | 4.27 (m)                            |                            | 8', 9'b      | 1',7',8',7        | 2',6',8'         |
| 9'b      | 3.90 (dd, 9.3, 3.6)                 | 71.8, CH <sub>2</sub>      | 8', 9'a      | 7',7'             | 7'               |

<sup>a</sup>Spectra recorded at 25 °C (800 MHz for <sup>1</sup>H and 200 MHz for <sup>13</sup>C); <sup>b</sup>signal not observed.

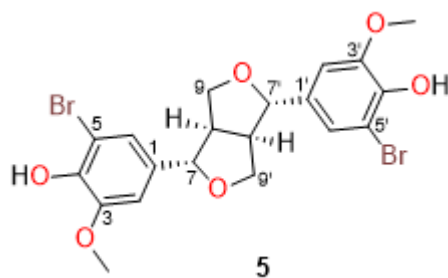

$^1\text{H}$  NMR spectrum of (+)-5,5'-dibromopinoresinol (**5**) in  $\text{CDCl}_3$

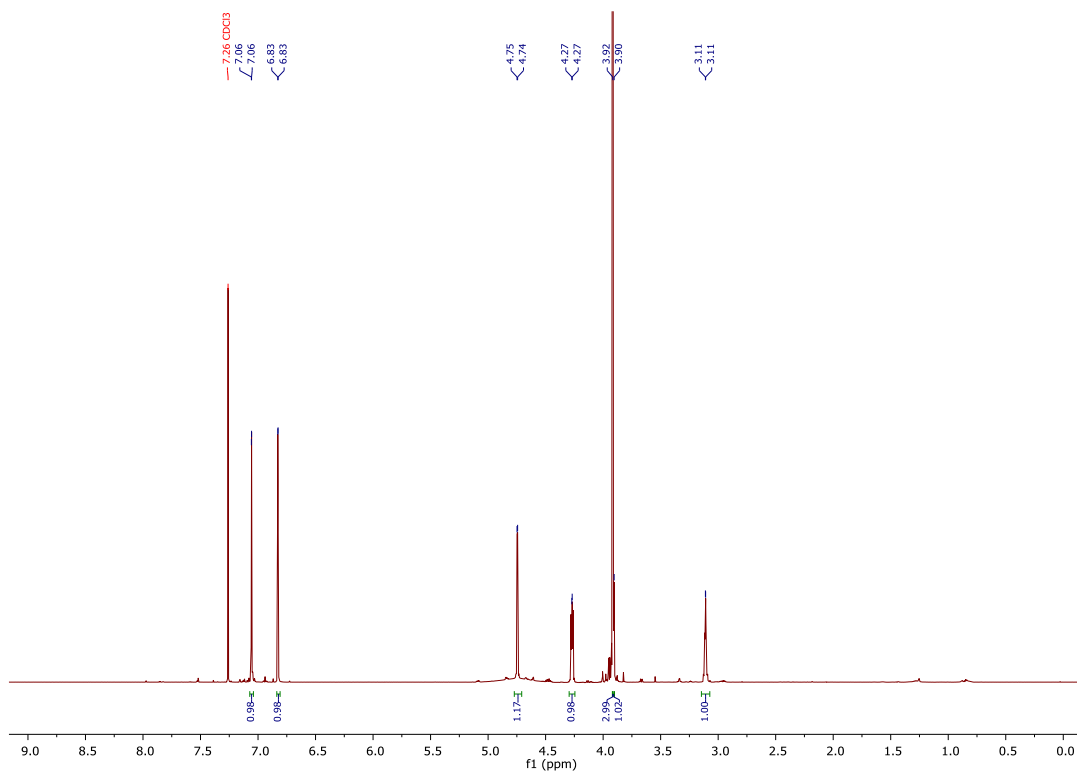

$^{13}\text{C}$  NMR spectrum of (+)-5,5'-dibromopinoresinol (**5**) in  $\text{CDCl}_3$

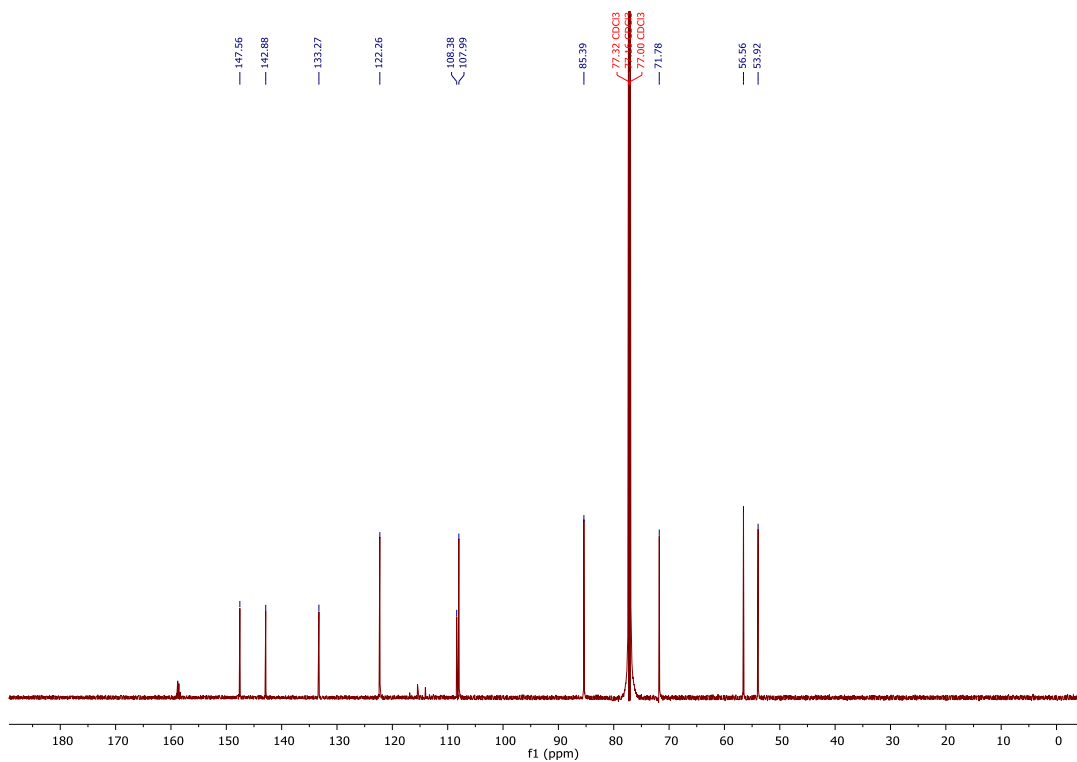

COSY spectrum of (+)-5,5'-dibromopinoresinol (**5**) in CDCl<sub>3</sub>

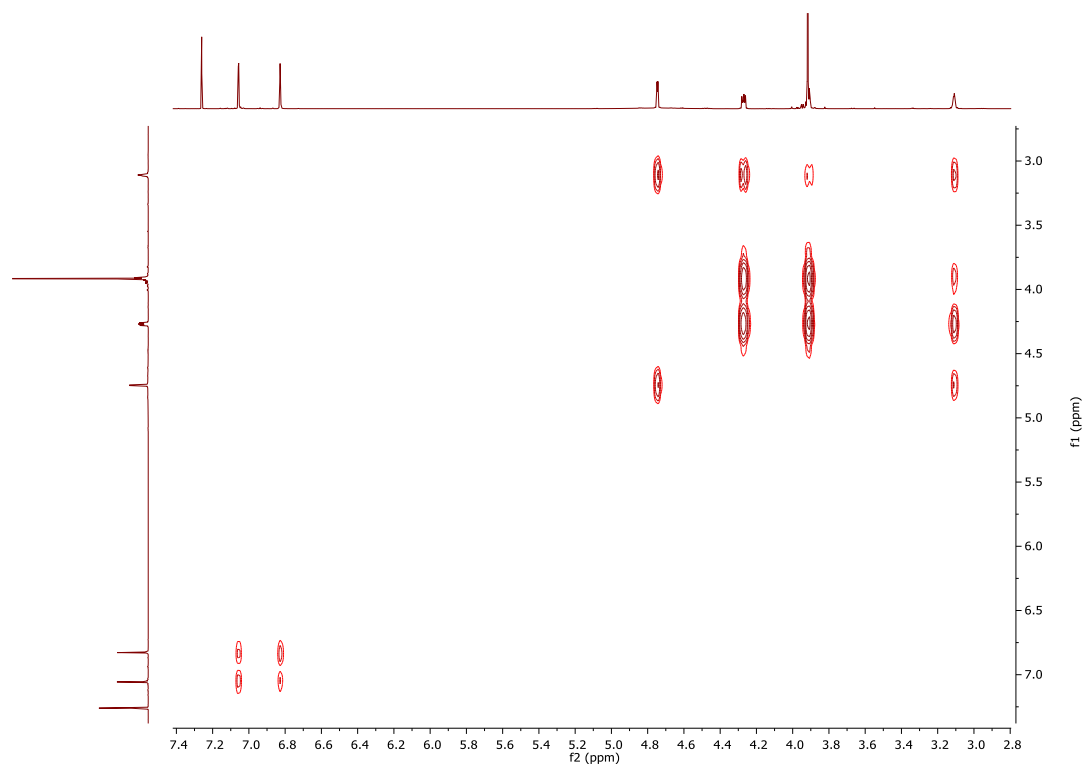

HSQC spectrum of (+)-5,5'-dibromopinoresinol (**5**) in CDCl<sub>3</sub>

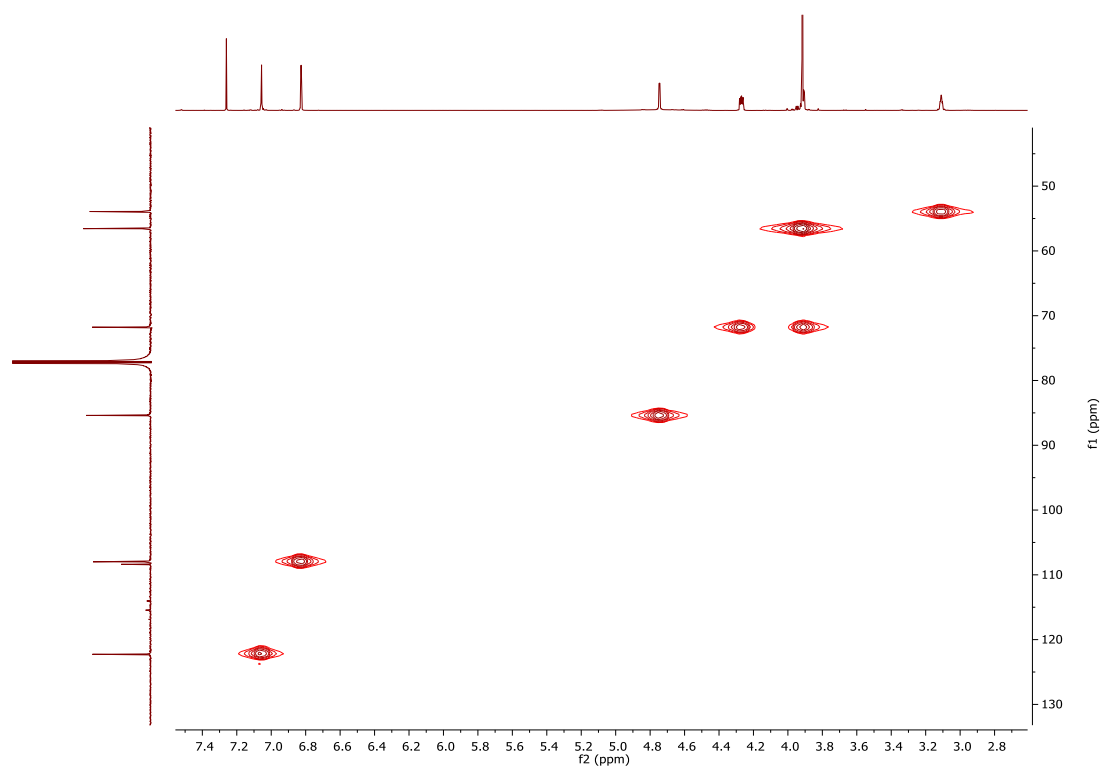

HMBC spectrum of (+)-5,5'-dibromopinoresinol (**5**) in CDCl<sub>3</sub>

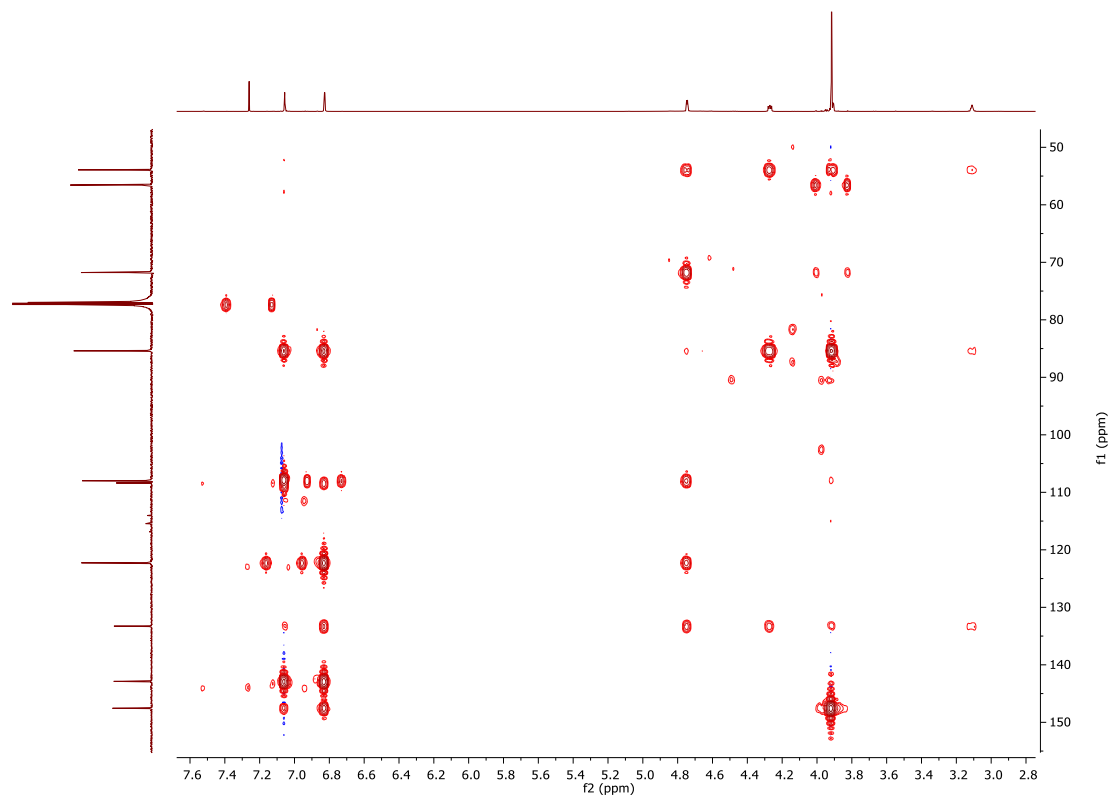

ROESY spectrum of (+)-5,5'-dibromopinoresinol (**5**) in CDCl<sub>3</sub>

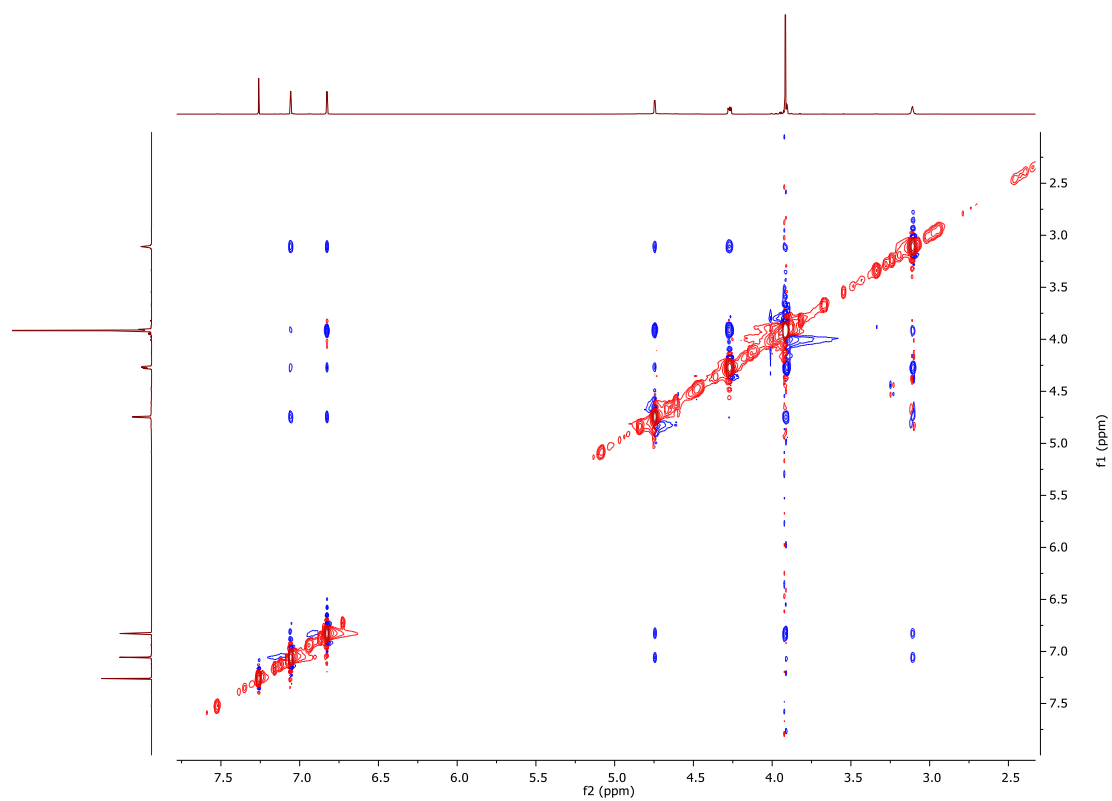

NMR data for (+)-4,4'-di(3,3-dimethylbutanoyl)pinoresinol (**6**) in CDCl<sub>3</sub><sup>a</sup>

| Position | $\delta_{\text{H}}$ , mult (J in Hz) | $\delta_{\text{C}}$ , type | COSY         | HMBC           | ROESY             |
|----------|--------------------------------------|----------------------------|--------------|----------------|-------------------|
| 1        |                                      | 139.9, C                   |              |                |                   |
| 2        | 6.98 (d, 1.9)                        | 110.0, CH                  | 6            | 4,6,7          | 3-OMe,7,8         |
| 3        |                                      | 151.4, C                   |              |                |                   |
| 3-OMe    | 3.83 (s)                             | 55.9, CH <sub>3</sub>      |              | 3              | 2                 |
| 4        |                                      | 139.3, C                   |              |                |                   |
| 5        | 6.99 (d, 8.1)                        | 123.0, CH                  | 6            | 1,3            |                   |
| 6        | 6.88 (dd, 8.1, 1.9)                  | 118.0, CH                  | 2,5          | 2,4,7          | 7,8,9a            |
| 7        | 4.80 (d, 4.3)                        | 85.7, CH                   | 8            | 1,2,6,8,9      | 2,6,8,9b          |
| 8        | 3.09 (m)                             | 54.4, C                    | 7, 9a, 9b    | 1,7,7',8',9    | 2,6,7,9a,9b       |
| 9a       | 4.28 (m)                             | 72.0, CH <sub>2</sub>      | 8, 9b        | 7,8,7',8'      | 6,8               |
| 9b       | 3.93 (dd, 9.3,3.6)                   | 72.0, CH <sub>2</sub>      | 8, 9a        | 7,8,7',8'      | 2,6,7             |
| 10       |                                      | 170.5, C                   |              |                |                   |
| 11       | 2.46 (s)                             | 47.7, CH <sub>2</sub>      |              | 10,12,13       | 13                |
| 12       |                                      | 31.2, C                    |              |                |                   |
| 13       | 1.14 (s)                             | 29.7, CH <sub>3</sub>      |              | 11,12,13       | 11                |
| 1'       |                                      | 139.9, C                   |              |                |                   |
| 2'       | 6.98 (d, 1.9)                        | 110.0, CH                  | 6'           | 4',6',7'       | 3'-OMe,7',8'      |
| 3'       |                                      | 151.4, C                   |              |                |                   |
| 3'-OMe   | 3.83 (s)                             | 55.9, CH <sub>3</sub>      |              | 3'             | 2'                |
| 4'       |                                      | 139.3, C                   |              |                |                   |
| 5'       | 6.99 (d, 8.1)                        | 123.0, CH                  | 6'           | 1',3'          |                   |
| 6'       | 6.88 (dd, 8.1, 1.9)                  | 118.0, CH                  | 2',5'        | 2',4',7'       | 7',8',9'a         |
| 7'       | 4.80 (d, 4.3)                        | 85.7, CH                   | 8'           | 1',2',6',8',9' | 2',6',8', 9'a,9'b |
| 8'       | 3.09 (m)                             | 54.4, C                    | 7', 9'a, 9'b | 1',7',7,8,9    | 2',6',7'          |
| 9'a      | 4.28 (m)                             | 72.0, CH <sub>2</sub>      | 8', 9'b      | 7',8',7,9      | 6',8'             |
| 9'b      | 3.93 (dd, 9.3,3.6)                   | 72.0, CH <sub>2</sub>      | 8', 9'a      | 7',8',7,8      | 2',6',7'          |
| 10'      |                                      | 170.5, C                   |              |                |                   |
| 11'      | 2.46 (s)                             | 47.7, CH <sub>2</sub>      |              | 10',12',13'    | 13'               |
| 12'      |                                      | 31.2, C                    |              |                |                   |
| 13'      | 1.14 (s)                             | 29.7, CH <sub>3</sub>      |              | 11',12',13'    | 11'               |

<sup>a</sup>Spectra recorded at 25 °C (800 MHz for <sup>1</sup>H and 200 MHz for <sup>13</sup>C).

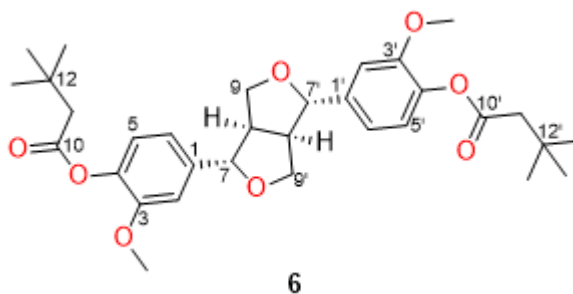

$^1\text{H}$  NMR spectrum of (+)-4,4'-di(3,3-dimethylbutanoyl)pinosresinol (**6**) in  $\text{CDCl}_3$

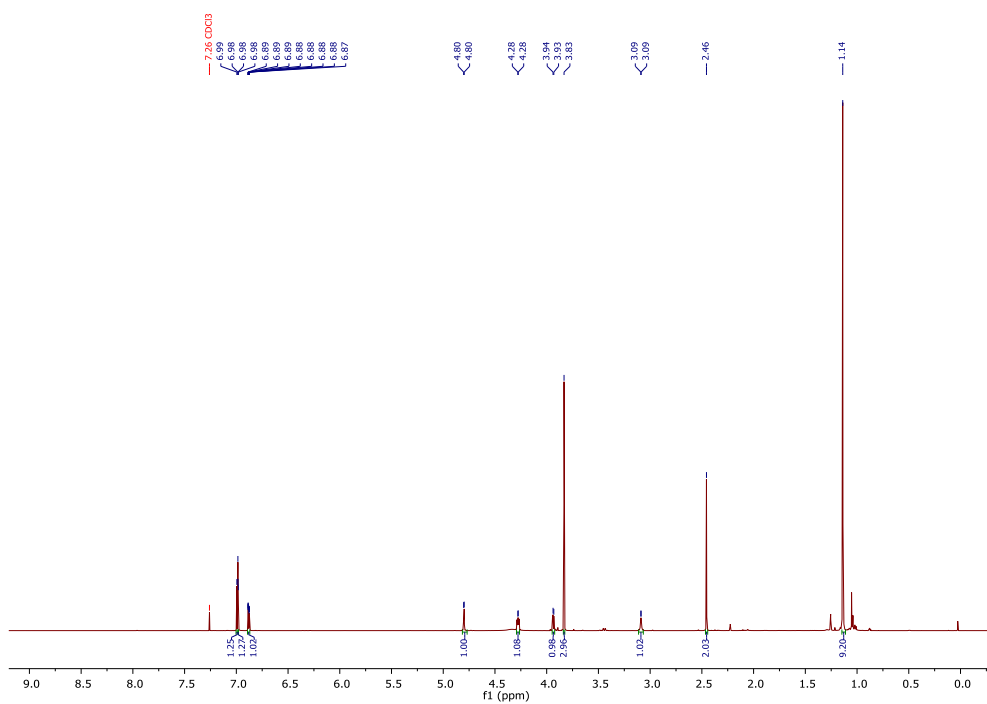

$^{13}\text{C}$  NMR spectrum of (+)-4,4'-di(3,3-dimethylbutanoyl)pinosresinol (**6**) in  $\text{CDCl}_3$

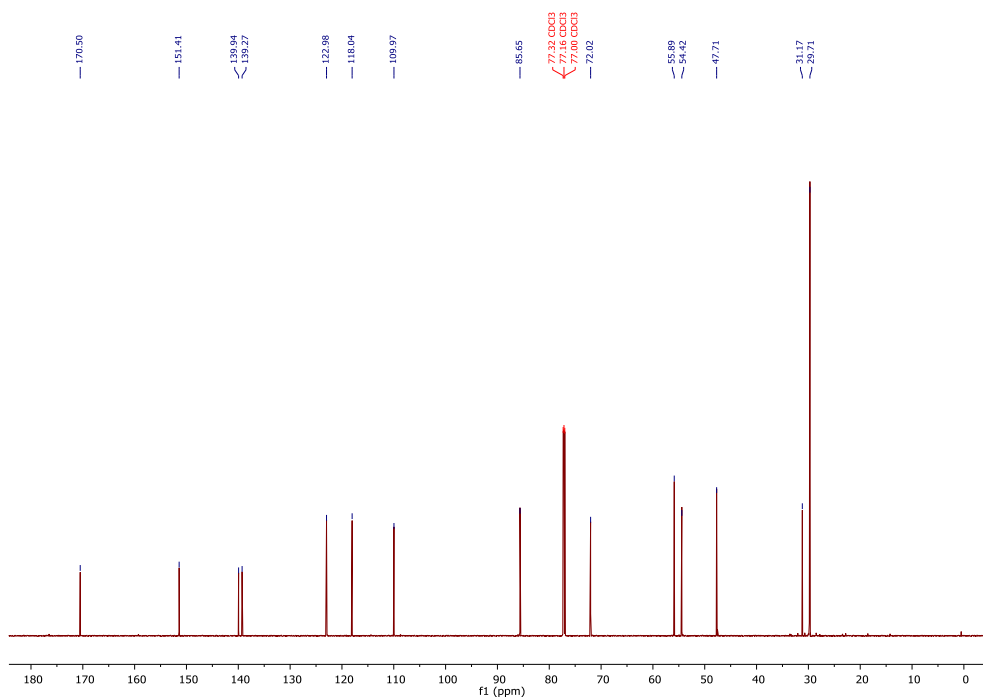

COSY spectrum of (+)-4,4'-di(3,3-dimethylbutanoyl)pinosresinol (**6**) in CDCl<sub>3</sub>

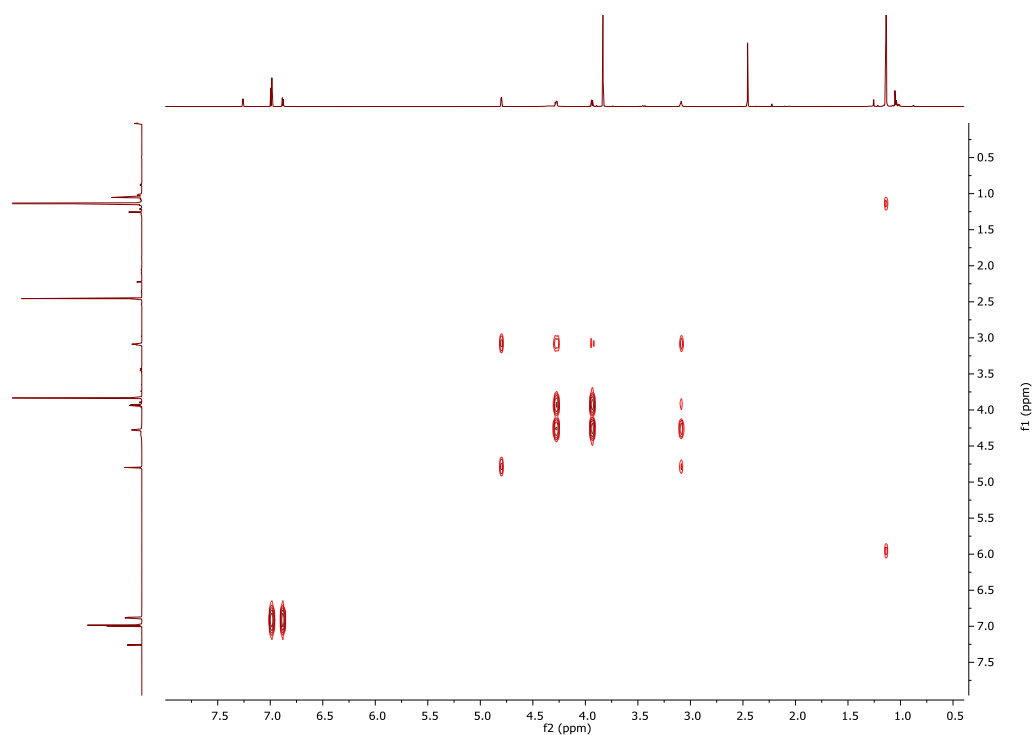

HSQC spectrum of (+)-4,4'-di(3,3-dimethylbutanoyl)pinosresinol (**6**) in CDCl<sub>3</sub>

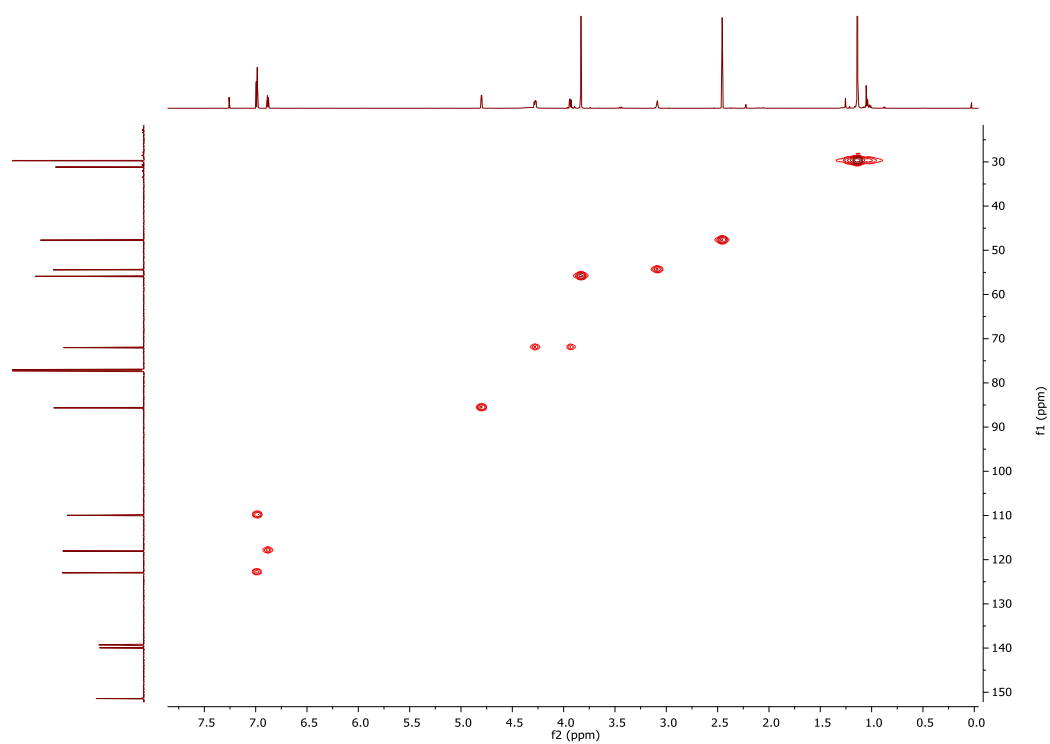

HMBC spectrum of (+)-4,4'-di(3,3-dimethylbutanoyl)pinosresinol (**6**) in CDCl<sub>3</sub>

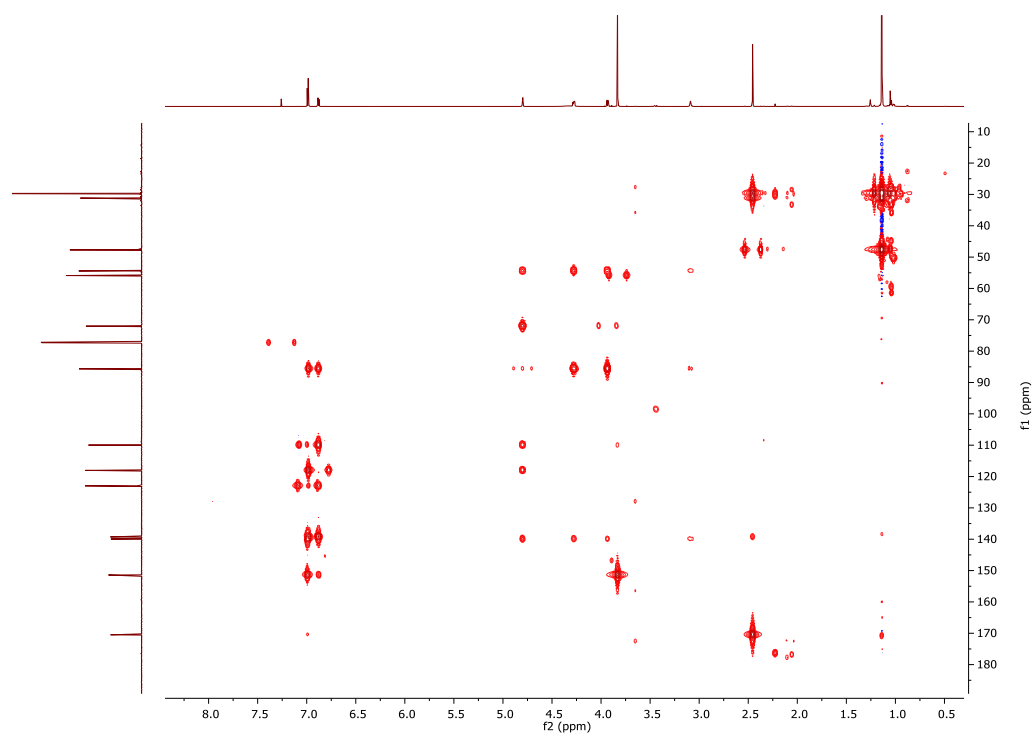

ROESY spectrum of (+)-4,4'-di(3,3-dimethylbutanoyl)pinosresinol (**6**) in CDCl<sub>3</sub>

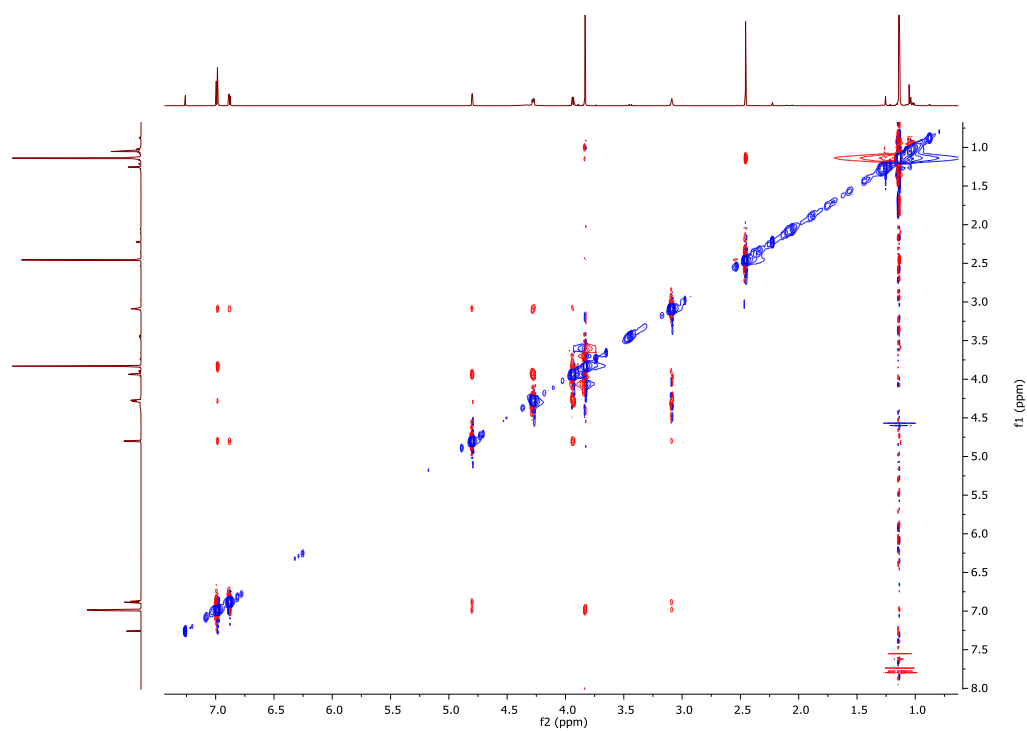

NMR data for (+)-4,4'-dipivaloylpinoresinol (**7**) in CDCl<sub>3</sub><sup>a</sup>

| Position | $\delta_{\text{H}}$ , mult (J in Hz) | $\delta_{\text{C}}$ , type | COSY         | HMBC                | ROESY        |
|----------|--------------------------------------|----------------------------|--------------|---------------------|--------------|
| 1        |                                      | 139.8, C                   |              |                     |              |
| 2        | 6.97 (d, 1.9)                        | 110.1, CH                  | 6            | 4,6,7               | 3-OMe,7, 8   |
| 3        |                                      | 151.5, C                   |              |                     |              |
| 3-OMe    | 3.82 (s)                             | 56.1, CH <sub>3</sub>      |              | 2 <sup>w</sup> ,3   | 2            |
| 4        |                                      | 139.7, C                   |              |                     |              |
| 5        | 6.98 (d, 8.3)                        | 122.8, CH                  | 6            | 1,3                 |              |
| 6        | 6.88 (dd, 8.3, 1.9)                  | 118.1, CH                  | 2,5          | 2,4,7               | 7,8,9a       |
| 7        | 4.80 (d, 4.3)                        | 85.7, CH                   | 2,6,8        | 1,2,6,8,9           | 2,6,8,9b     |
| 8        | 3.10 (m)                             | 54.5, CH                   | 7, 9a, 9b    | 1,7,7',8'           | 2,6,9a       |
| 9a       | 4.28 (m)                             | 72.0, CH <sub>2</sub>      | 8, 9b        | 1,7,8,2'            | 6,8,9b       |
| 9b       | 3.94 (dd, 9.4, 3.6)                  | 72.0, CH <sub>2</sub>      | 8, 9a        | 1,7,8,2'            | 7,9a         |
| 10       |                                      | 177.0, C                   |              |                     |              |
| 11       |                                      | 39.2, C                    |              |                     |              |
| 12       | 1.36 (s)                             | 27.4, CH <sub>3</sub>      |              | 10, 11,12           |              |
| 1'       |                                      | 139.8, C                   |              |                     |              |
| 2'       | 6.98 (d, 1.9)                        | 110.1, CH                  | 6'           | 4',6',7'            | 3-OMe,7, 8   |
| 3'       |                                      | 151.5, C                   |              |                     |              |
| 3'-OMe   | 3.82 (s)                             | 56.1, CH <sub>3</sub>      |              | 2' <sup>w</sup> ,3' | 2'           |
| 4'       |                                      | 139.7, C                   |              |                     |              |
| 5'       | 6.97 (d, 8.3)                        | 122.8, CH                  | 6'           | 1',3'               |              |
| 6'       | 6.88 (dd, 8.3, 1.9)                  | 118.1, CH                  | 2',5'        | 2',4',7'            | 7',8',9'a    |
| 7'       | 4.80 (d, 4.3)                        | 85.7, CH                   | 2',6',8'     | 1',2',6',8',9'      | 2',6',8',9'b |
| 8'       | 3.10 (m)                             | 54.5, CH                   | 7', 9'a, 9'b | 1',7',7,8           | 2',6',9'a    |
| 9'a      | 4.28 (m)                             | 72.0, CH <sub>2</sub>      | 8', 9'b      | 1',7',8',2          | 6',8', 9'b   |
| 9'b      | 3.94 (dd, 9.4, 3.6)                  | 72.0, CH <sub>2</sub>      | 8', 9'a      | 1',7',8',2          | 7',9'a       |
| 10'      |                                      | 177.0, C                   |              |                     |              |
| 11'      |                                      | 39.2, C                    |              |                     |              |
| 12'      | 1.36 (s)                             | 27.4, CH <sub>3</sub>      |              | 10', 11',12'        |              |

<sup>a</sup>Spectra recorded at 25 °C (800 MHz for <sup>1</sup>H and 200 MHz for <sup>13</sup>C); <sup>w</sup>weak correlation.

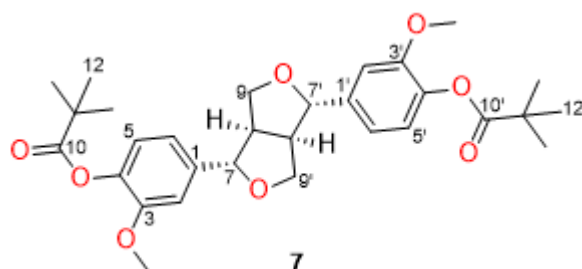

$^1\text{H}$  NMR spectrum of (+)-4,4'-dipivaloylpinoresinol (**7**) in  $\text{CDCl}_3$

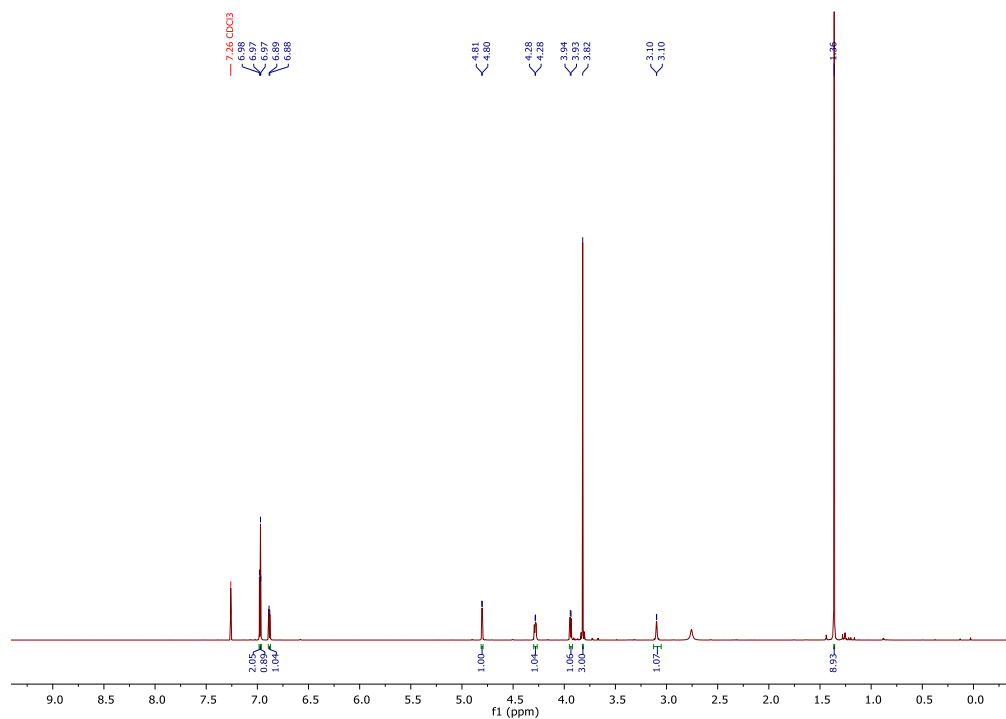

$^{13}\text{C}$  NMR spectrum of (+)-4,4'-dipivaloylpinoresinol (**7**) in  $\text{CDCl}_3$

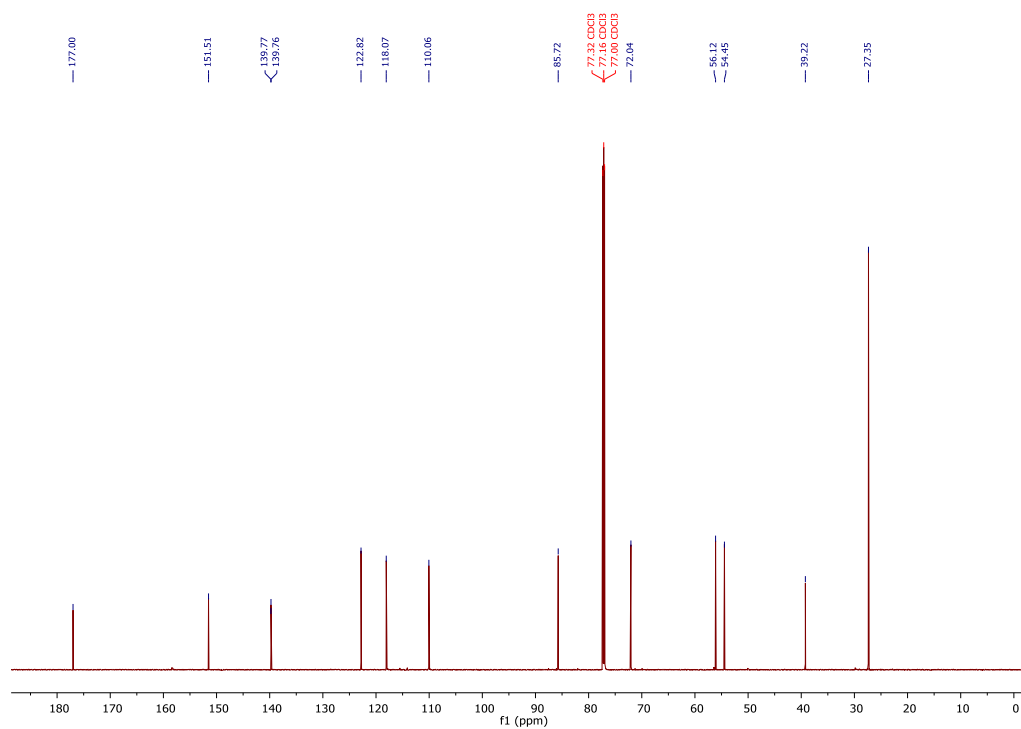

COSY spectrum of (+)-4,4'-dipivaloylpinoresinol (**7**) in CDCl<sub>3</sub>

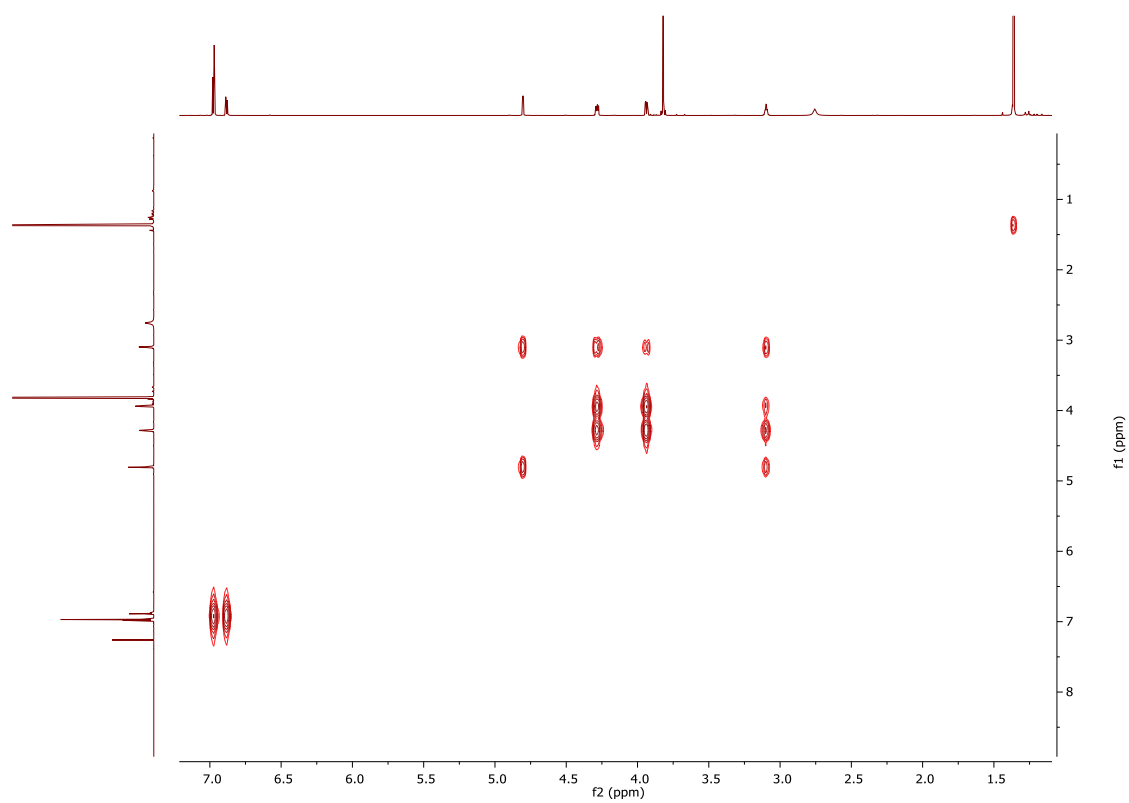

HSQC spectrum of (+)-4,4'-dipivaloylpinoresinol (**7**) in CDCl<sub>3</sub>

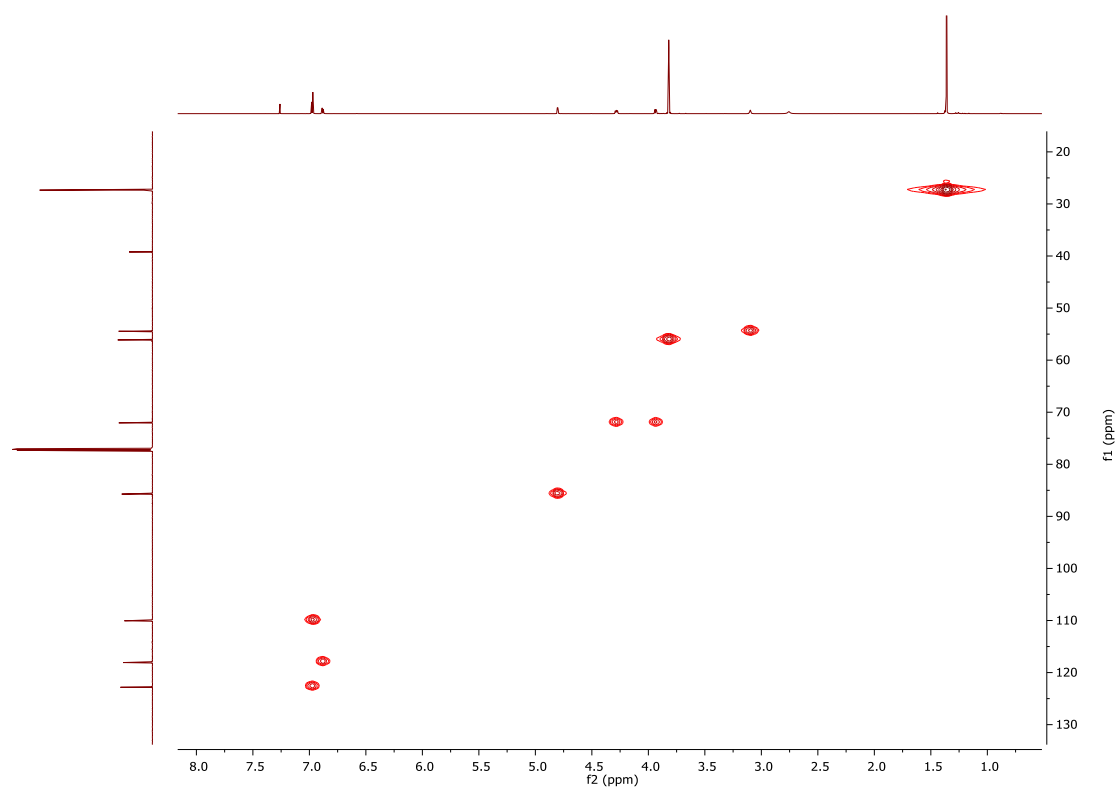

HMBC spectrum of (+)-4,4'-dipivaloylpinoresinol (**7**) in CDCl<sub>3</sub>

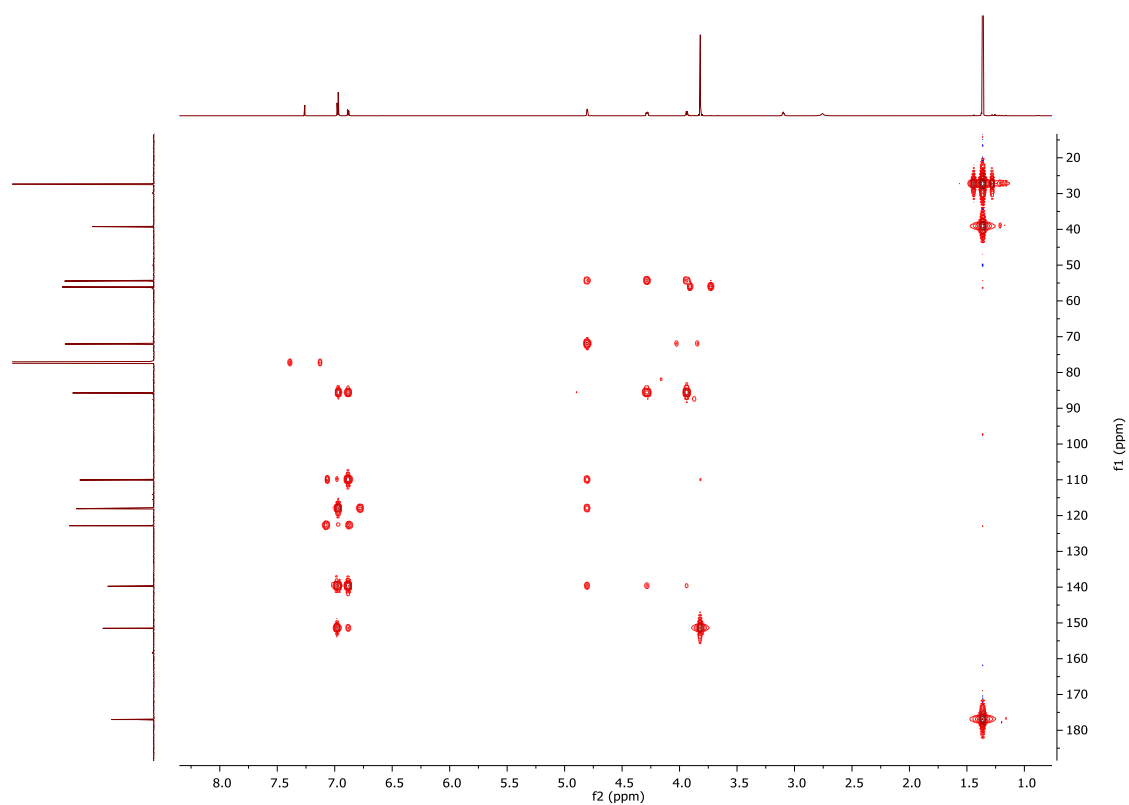

ROESY spectrum of (+)-4,4'-dipivaloylpinoresinol (**7**) in CDCl<sub>3</sub>

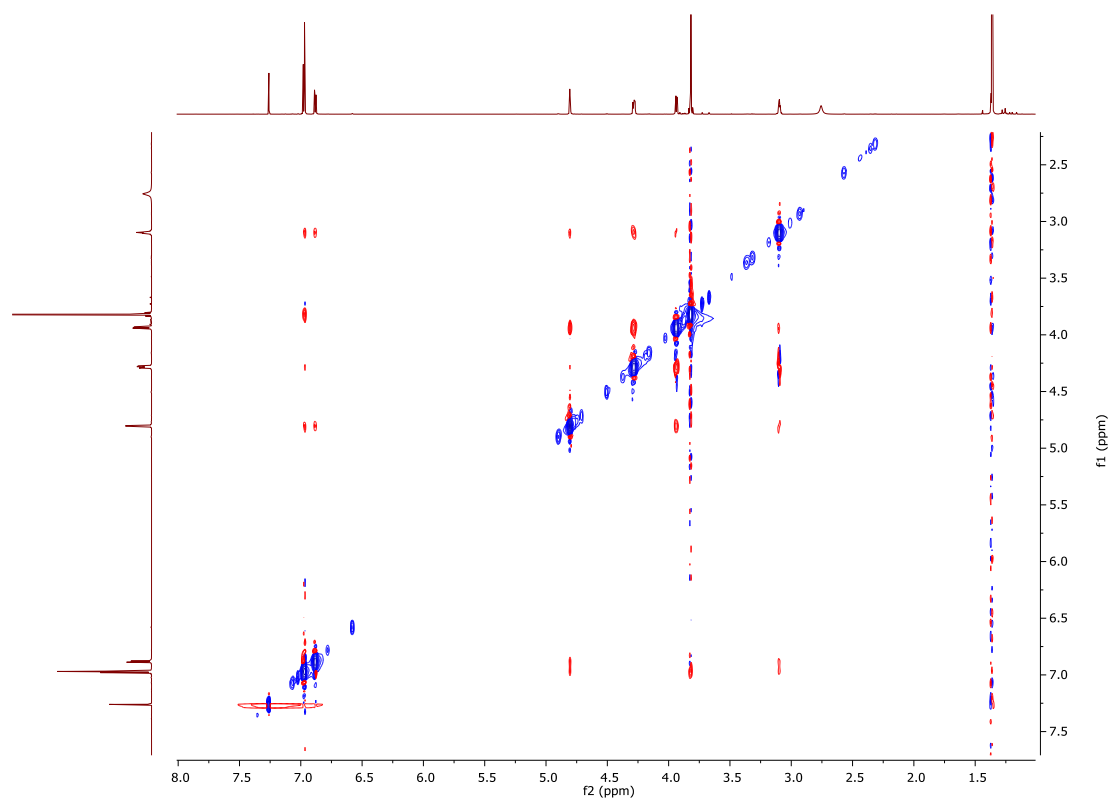

# UHPLC-MS data of salicifoliol (1)

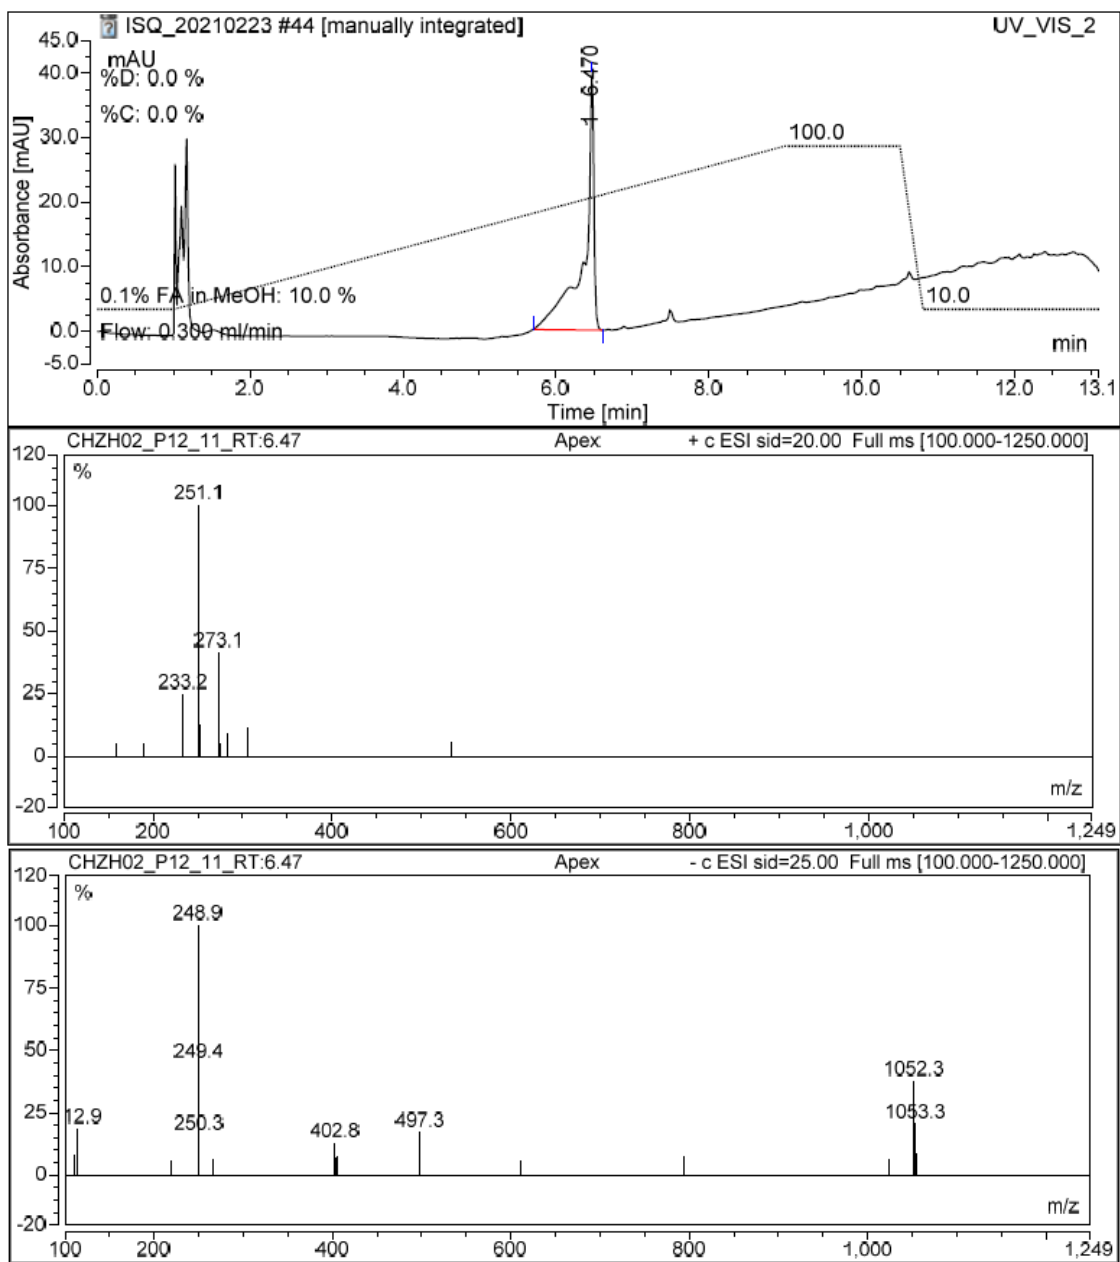

UHPLC-MS data of (+)-pinoresinol (2)

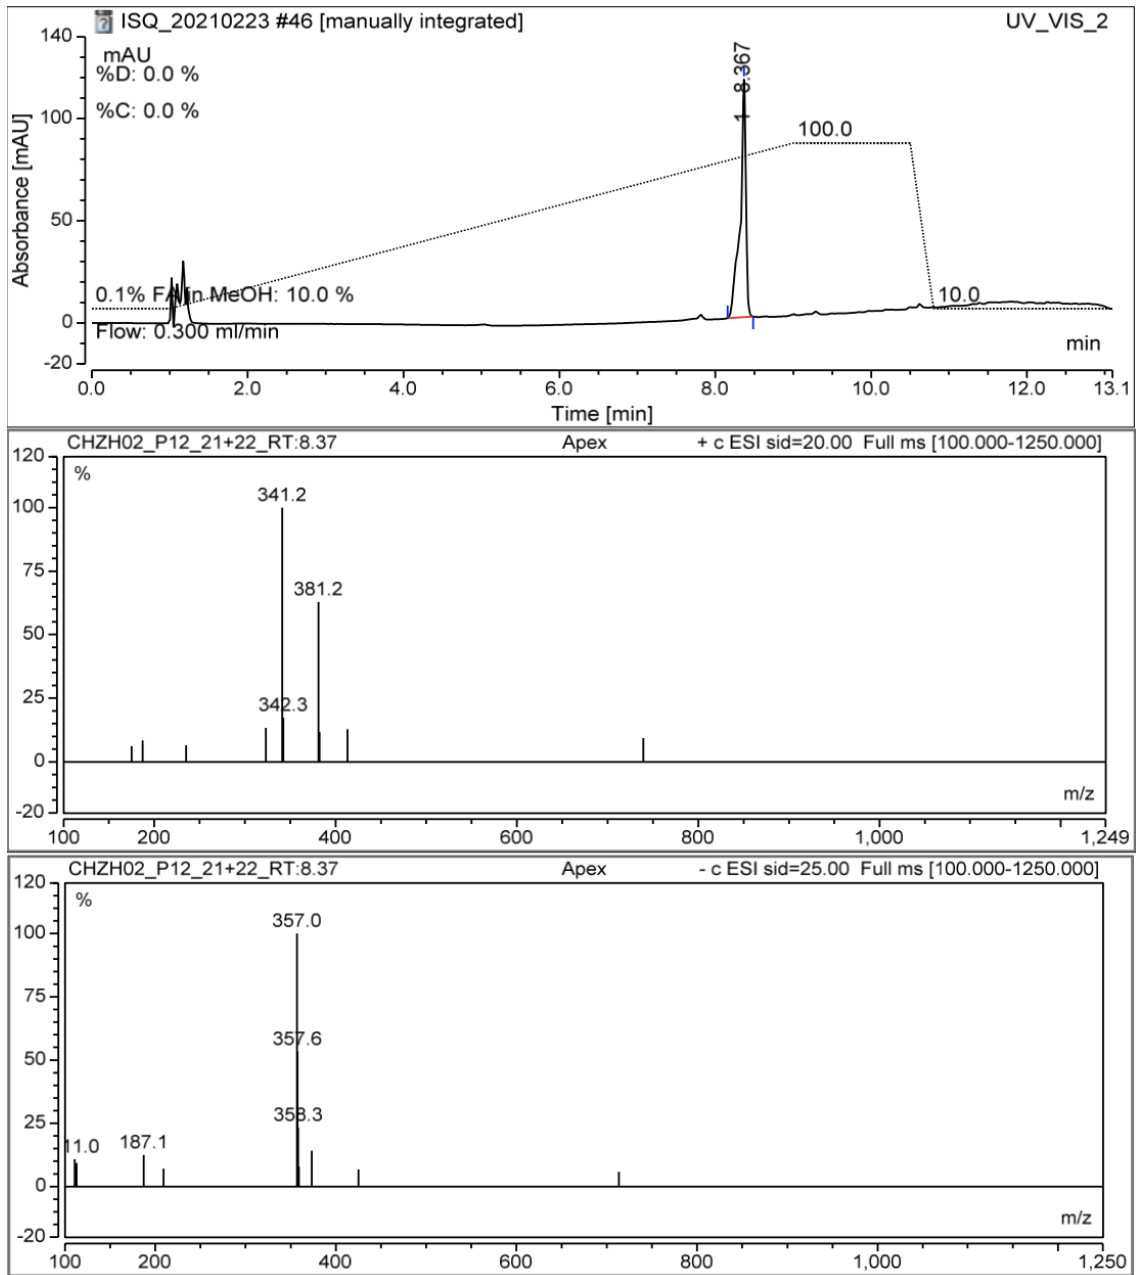

### UHPLC-MS data of (+)-eudesmin (3)

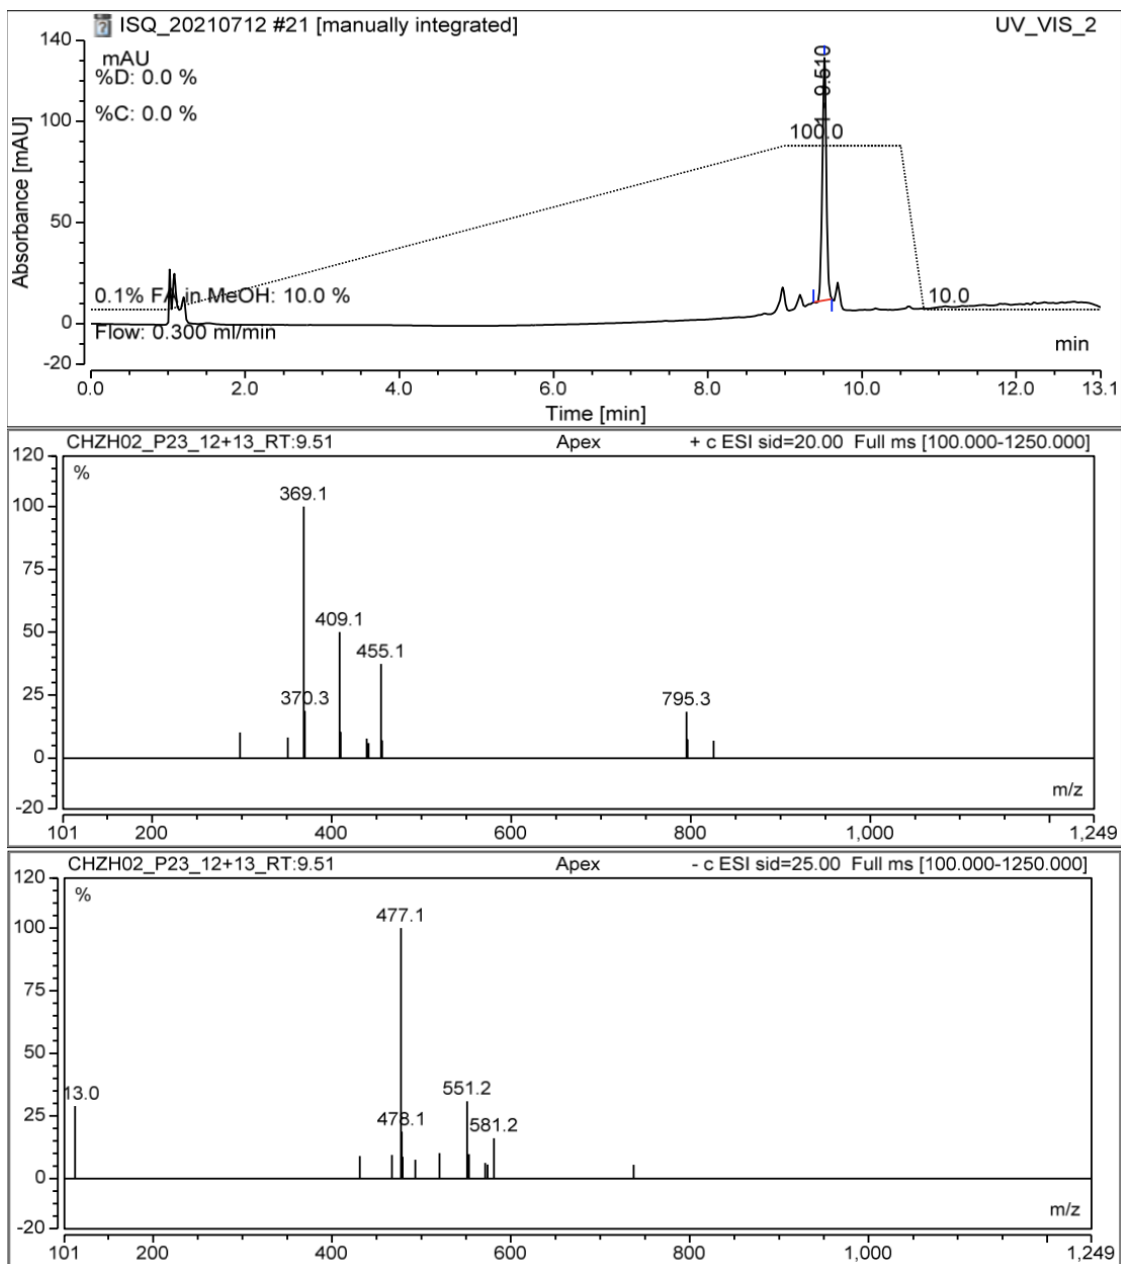

UHPLC-MS data of (+)-phillygenin (4)

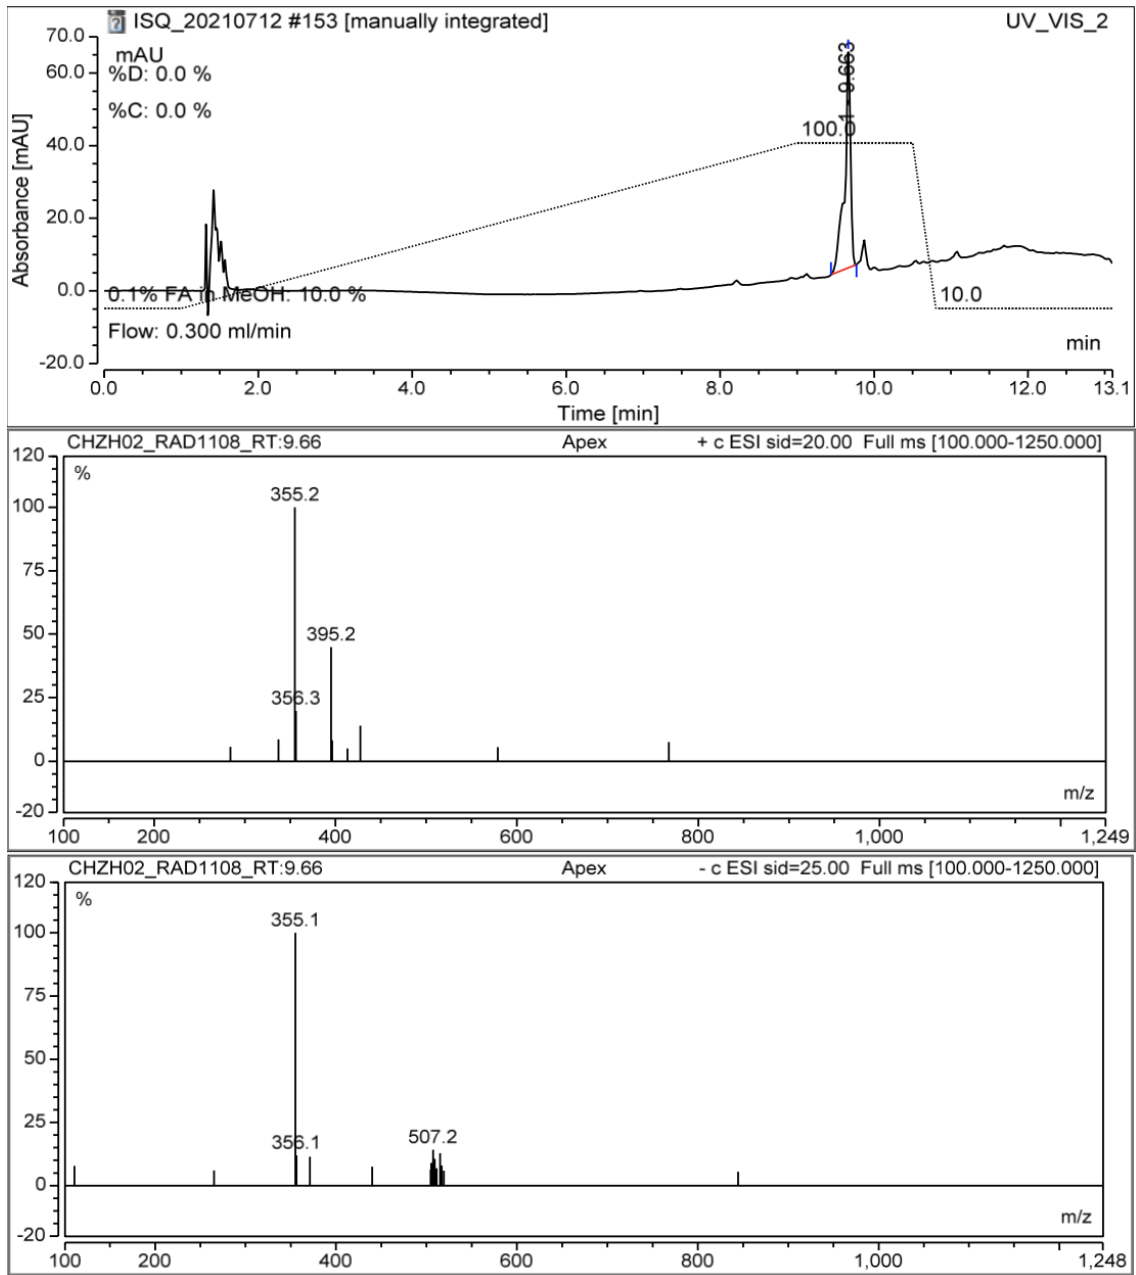

UHPLC-MS data of (+)-5,5'-dibromopinoresinol (5)

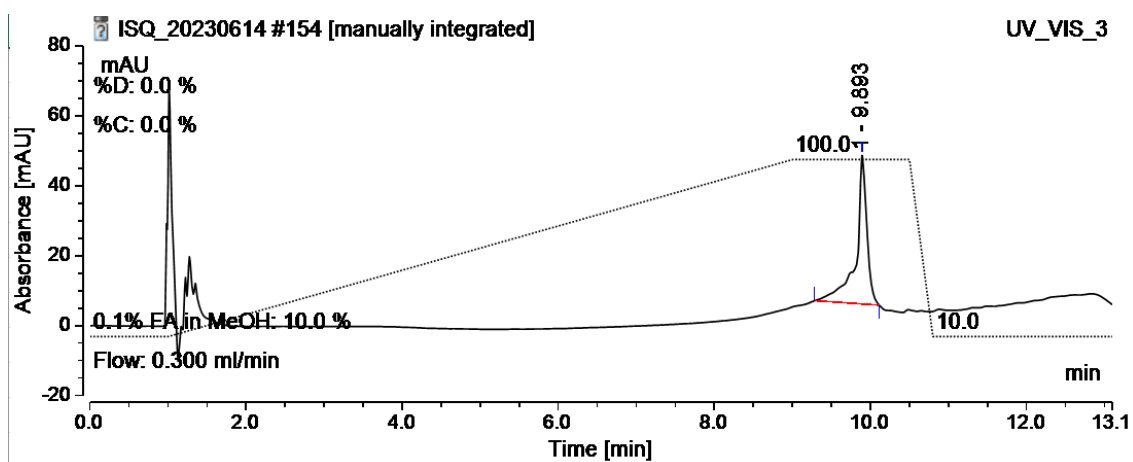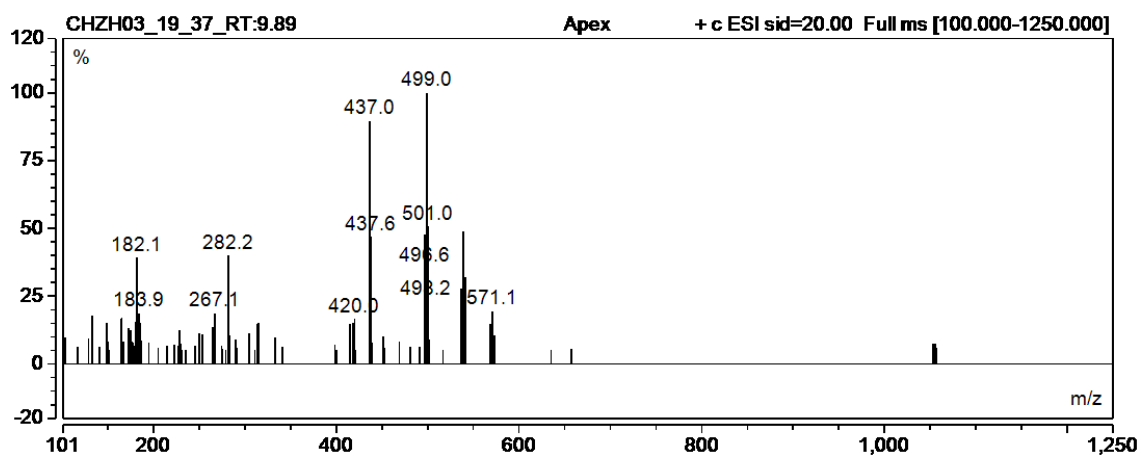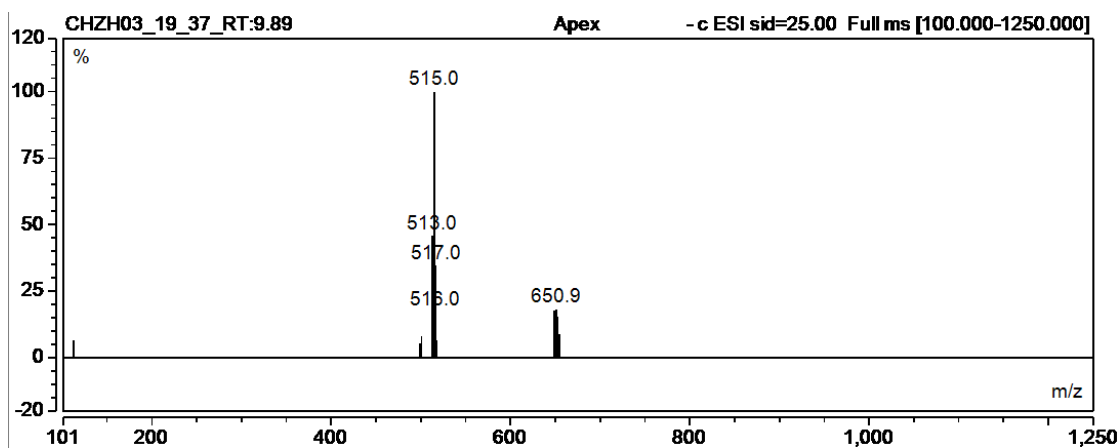

UHPLC-MS data of (+)-4,4'-di(3,3-dimethylbutanoyl)pinoresinol (**6**)

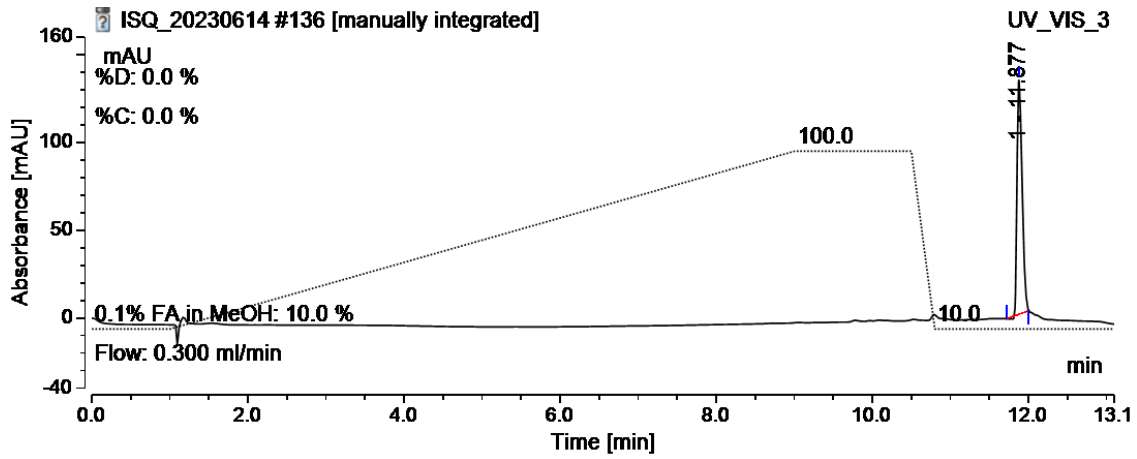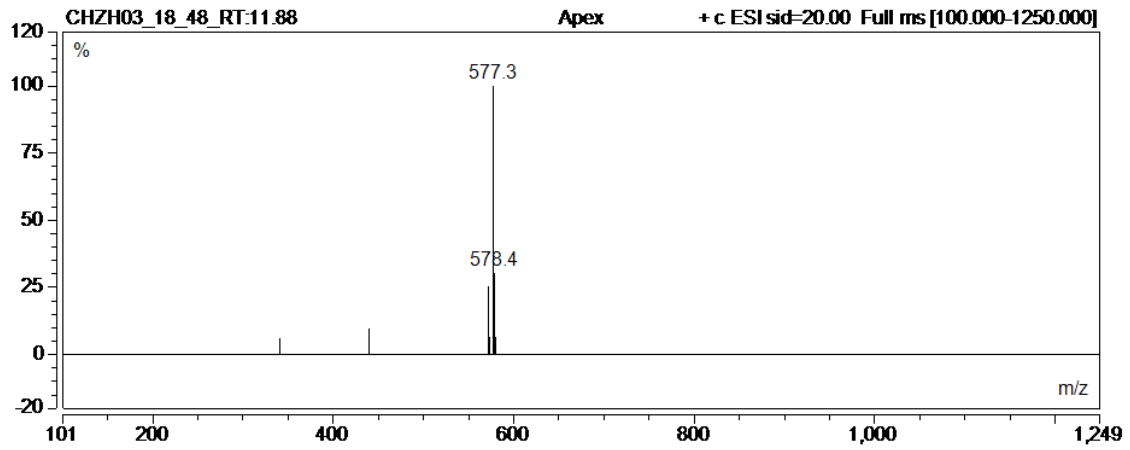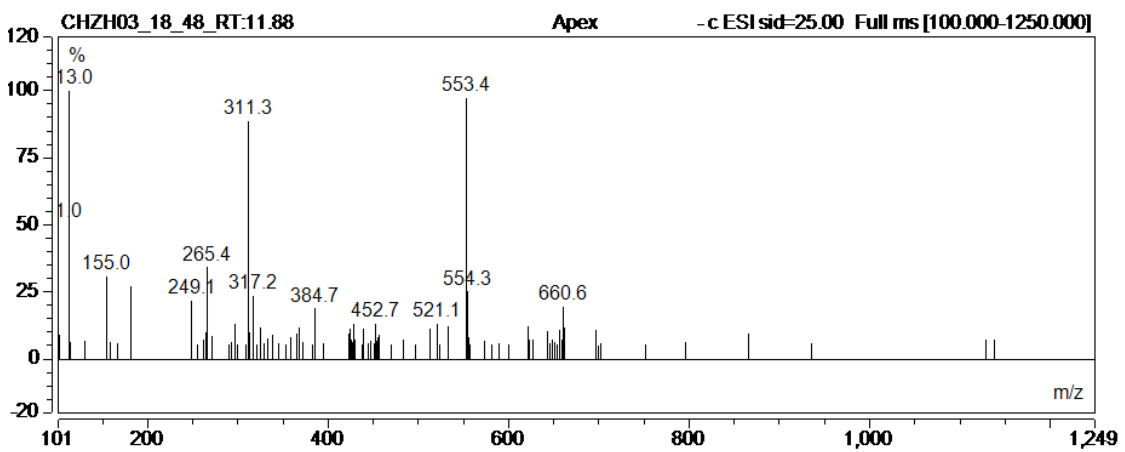

UHPLC-MS data of (+)-4,4'-divaloylpinoresinol (7)

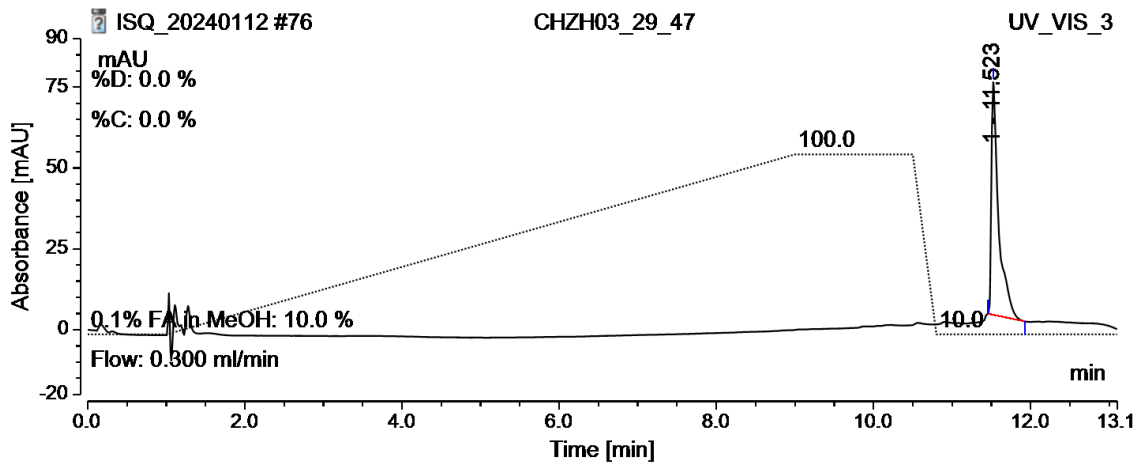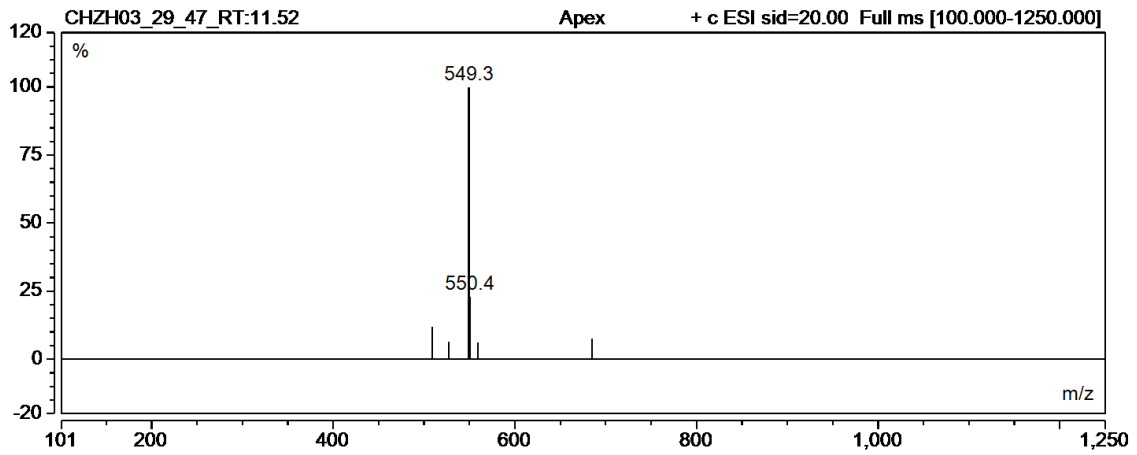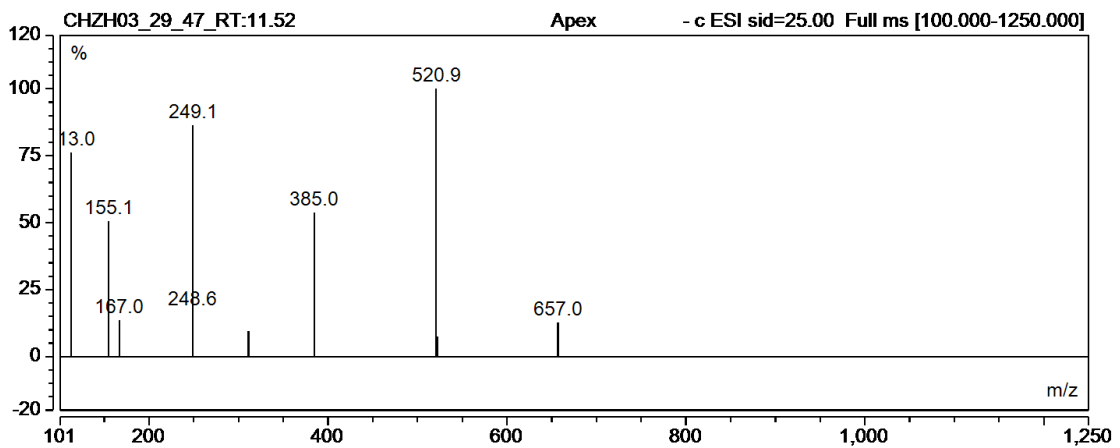

# HRESIMS of (+)-pinoresinol (2)

## Mass Spectrum SmartFormula Report

### Analysis Info

Analysis Name D:\Data\Wendy\20211109\RAD1105\_000001.d  
 Method lmw\_low\_DI\_20211027  
 Sample Name RAD1105  
 Comment

Acquisition Date 9/11/21 9:38:46 AM

Operator  
 Instrument solariX XR

### Acquisition Parameter

|                       |            |                   |     |                           |                     |
|-----------------------|------------|-------------------|-----|---------------------------|---------------------|
| Acquisition Mode      | Single MS  | Acquired Scans    | 8   | Calibration Date          | Wed Oct 27 11:09:46 |
| n/a                   | n/a        | No. of Cell Fills | 1   | Data Acquisition Size     | 2028576             |
| Broadband Low Mass    | 98.3 m/z   | n/a               | n/a | Data Processing Size (SI) | 2097152             |
| Broadband High Mass   | 2000.0 m/z | n/a               | n/a | Apodization               | Full-Sine           |
| Source Accumulation   | 0.000 sec  | n/a               | n/a |                           |                     |
| Ion Accumulation Time | 0.300 sec  |                   |     |                           |                     |

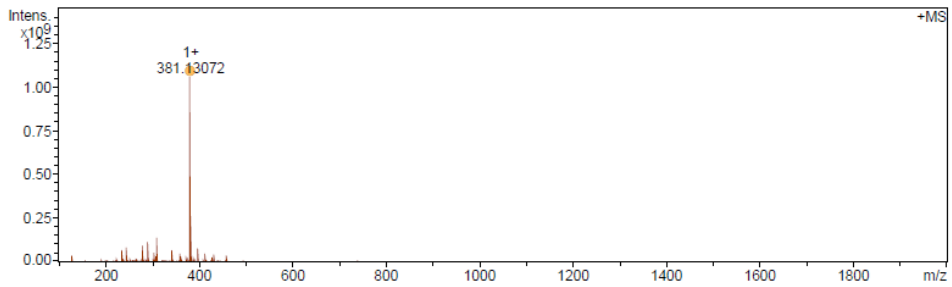

| Meas. m/z  | # | Ion Formula  | Score  | m/z        | err [ppm] | Mean err [ppm] | mSigma | rdb  | e <sup>-</sup> Conf | N-Rule |
|------------|---|--------------|--------|------------|-----------|----------------|--------|------|---------------------|--------|
| 381.130717 | 1 | C21H18N4NaO2 | 72.04  | 381.132197 | 3.9       | 2.8            | 12.0   | 15.0 | even                | ok     |
|            | 2 | C20H22NaO6   | 100.00 | 381.130859 | 0.4       | -0.4           | 17.3   | 10.0 | even                | ok     |

# HRESIMS of (+)-eudesmin (3)

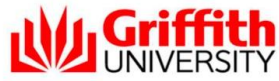

## High Resolution Mass Spectrum

### Analysis Info

Analysis Name D:\Data\Chem\20220808\RAD1106000001.d  
Method DirectInfusion\_2018\_pos.m  
Sample Name RAD1106  
Comment

Acquisition Date 8/8/2022 4:28:02 PM  
Instrument maXis II ETD 1823391.22321

### +MS, 0.1-0.1min #5-6

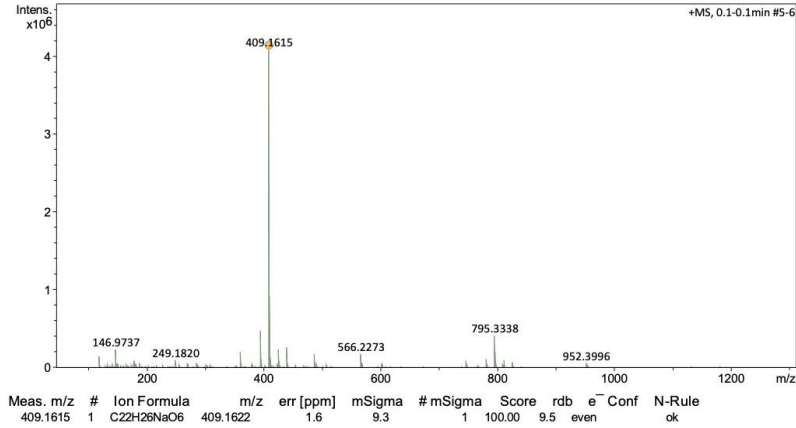

# HRESIMS of (+)-phillygenin (4)

## Mass Spectrum SmartFormula Report

### Analysis Info

Analysis Name D:\Data\Sasha\APRIL 2024\RAD1108000001.d  
Method DirectInfusion\_2018\_pos.m  
Sample Name RAD1108  
Comment

Acquisition Date 4/9/2024 10:11:13 AM

Operator Demo User  
Instrument maXis II ETD

### Acquisition Parameter

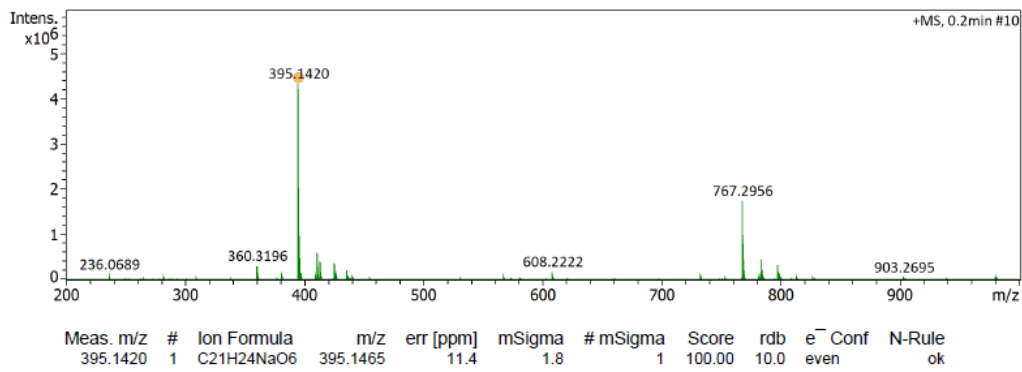

# HRESIMS of (+)-5,5'-dibromopinoresinol (5)

## Mass Spectrum SmartFormula Report

### Analysis Info

Analysis Name D:\Data\Sasha\May 2024\RAD1137000001.d  
Method DirectInfusion\_2018\_pos.m  
Sample Name RAD1137  
Comment

Acquisition Date 5/21/2024 1:18:18 PM

Operator Demo User  
Instrument maXis II ETD

### Acquisition Parameter

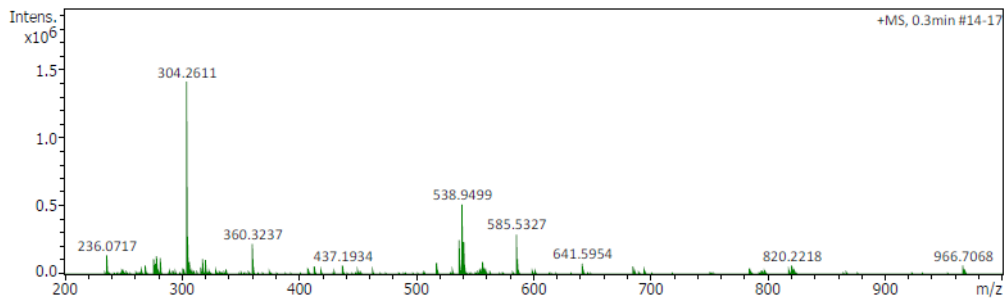

| Meas. m/z | # | Ion Formula   | m/z      | err [ppm] | mSigma | # mSigma | Score  | rdb  | e <sup>-</sup> Conf | N-Rule |
|-----------|---|---------------|----------|-----------|--------|----------|--------|------|---------------------|--------|
| 536.9519  | 1 | C20H20Br2NaO6 | 536.9519 | 0.0       | 25.4   | 1        | 100.00 | 14.0 | even                | ok     |

# HRESIMS of (+)-4,4'-di(3,3-dimethylbutanoyl)pinosresinol (6)

## Mass Spectrum SmartFormula Report

### Analysis Info

Analysis Name D:\Data\Sasha\May 2024\RAD1136000001.d  
Method DirectInfusion\_2018\_pos.m  
Sample Name RAD1136  
Comment

Acquisition Date 5/21/2024 1:26:45 PM

Operator Demo User  
Instrument maXis II ETD

### Acquisition Parameter

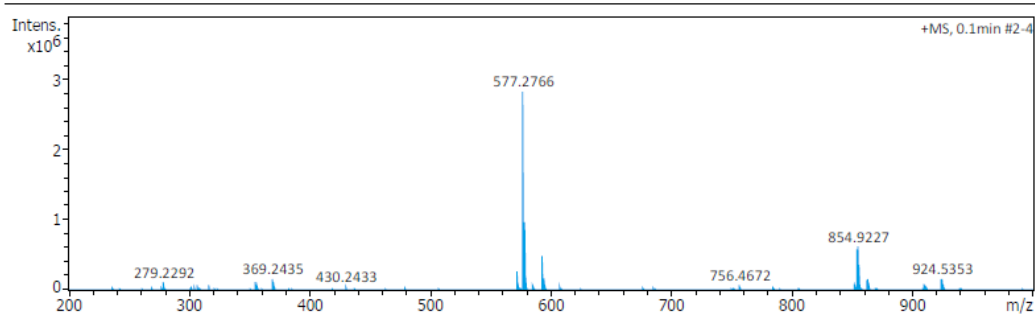

| Meas. m/z | # | Ion Formula                                      | m/z      | err [ppm] | mSigma | # mSigma | Score  | rdb  | e <sup>-</sup> Conf | N-Rule |
|-----------|---|--------------------------------------------------|----------|-----------|--------|----------|--------|------|---------------------|--------|
| 577.2766  | 1 | C <sub>32</sub> H <sub>42</sub> NaO <sub>8</sub> | 577.2772 | 1.0       | 6.6    | 2        | 100.00 | 12.0 | even                | ok     |

# HRESIMS of (+)-4,4'-dipivaloylpinoresinol (7)

## Mass Spectrum SmartFormula Report

### Analysis Info

Analysis Name D:\Data\Sasha\May 2024\RAD1138000001.d  
Method DirectInfusion\_2018\_pos.m  
Sample Name RAD1138  
Comment

Acquisition Date 5/21/2024 1:08:27 PM

Operator Demo User  
Instrument maXis II ETD

### Acquisition Parameter

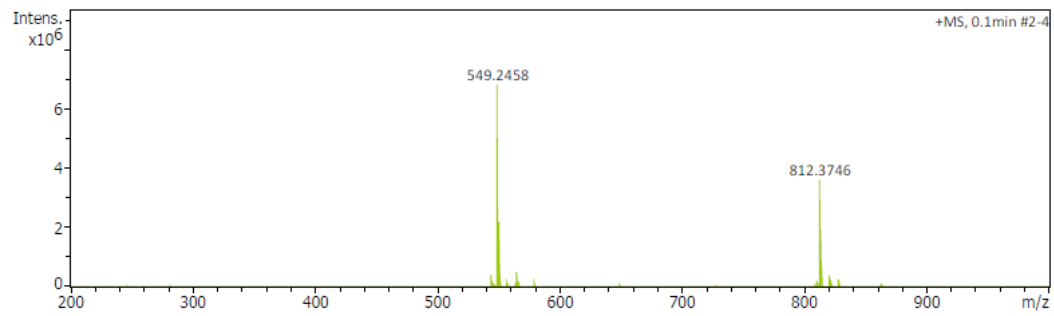

| Meas. m/z | # | Ion Formula                                      | m/z      | err [ppm] | mSigma | # mSigma | Score  | rdb  | e <sup>-</sup> Conf | N-Rule |
|-----------|---|--------------------------------------------------|----------|-----------|--------|----------|--------|------|---------------------|--------|
| 549.2458  | 1 | C <sub>30</sub> H <sub>38</sub> NaO <sub>8</sub> | 549.2459 | 0.1       | 7.5    | 2        | 100.00 | 12.0 | even                | ok     |

NMR data comparison for (+)-5,5'-dibromopinoresinol (**5**) and previously synthesised and reported racemic ( $\pm$ )-5,5'-dibromopinoresinol in acetone- $d_6$

| Position | $\delta_H$ (mult, J in Hz)<br>800 MHz data, Zhang (2026) et al | $\delta_H$ (mult, J in Hz)<br>500 MHz data, Yue (2021) et al |
|----------|----------------------------------------------------------------|--------------------------------------------------------------|
| 1        |                                                                |                                                              |
| 2        | 7.00 (d, 1.8)                                                  | 6.99 (d, 1.86)                                               |
| 3        |                                                                |                                                              |
| 3-OMe    | 3.87 (s)                                                       | 3.85 (s)                                                     |
| 4        |                                                                |                                                              |
| 4-OH     | 8.22 (s)                                                       | a                                                            |
| 5        |                                                                |                                                              |
| 6        | 7.12 (dd, 1.8, 0.6)                                            | 7.11 (dd, 1.88, 0.51)                                        |
| 7        | 4.70 (d, 4.10)                                                 | 4.69 (d, 4.10)                                               |
| 8        | 3.11 (m)                                                       | 3.10 (m)                                                     |
| 9a       | 4.23 (m)                                                       | 4.22 (m)                                                     |
| 9b       | 3.85 (dd 9.3, 3.6)                                             | 3.84 (d, 3.68)                                               |
| 1'       |                                                                |                                                              |
| 2'       | 7.00 (d, 1.8)                                                  | 6.99 (d, 1.86)                                               |
| 3'       |                                                                |                                                              |
| 3'-OMe   | 3.87 (s)                                                       | 3.85 (s)                                                     |
| 4'       |                                                                |                                                              |
| 4'-OH    | 8.22 (s)                                                       | a                                                            |
| 5'       |                                                                |                                                              |
| 6'       | 7.12 (dd, 1.8, 0.6)                                            | 7.11 (dd, 1.88, 0.51)                                        |
| 7'       | 4.70 (d, 4.10)                                                 | 4.69 (d, 4.10)                                               |
| 8'       | 3.11 (m)                                                       | 3.10 (m)                                                     |
| 9'a      | 4.23 (m)                                                       | 4.22 (m)                                                     |
| 9'b      | 3.85 (dd 9.3, 3.6)                                             | 3.84 (d, 3.68)                                               |

<sup>a</sup>Signal not observed.

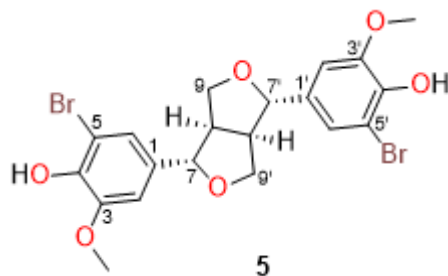

$^1\text{H}$  NMR spectrum of (+)-5,5'-dibromopinoresinol (**5**) in acetone- $d_6$

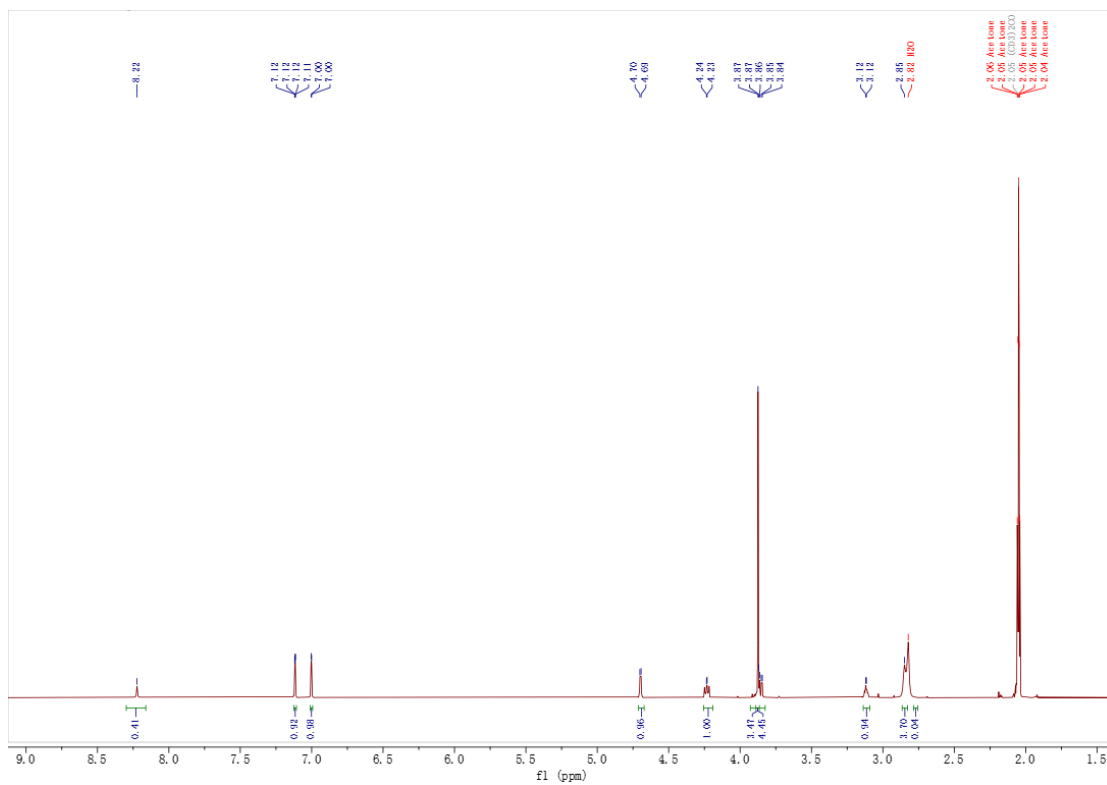

Supplement: Additional file 1 [file 1860-5397-22-54-S1.pdf]
